# Supplementary material
Source: Royal Society of Chemistry journal article supplement (doi:10.1039/d6tc01133k)
Supplement: d6tc01133k1.pdf [file d6tc01133k1.pdf]

## Chromenopyrazole-based TADF emitters for bluish-green and sky-blue OLEDs

Vladislav M. Korshunov,<sup>\*a,b</sup> Timofey N. Chmovzh,<sup>c</sup> Alisia V. Tsorieva,<sup>a</sup> Ivan A. Zhukov,<sup>c,d,e</sup> Dmitry A. Lypenko,<sup>f</sup> Darina I. Nasyrova,<sup>c</sup> Artem V. Dmitriev,<sup>f</sup> Ivan V. Ivanov,<sup>d</sup> Valery F. Traven,<sup>d,e</sup> Ilya V. Taydakov,<sup>a</sup> Oleg A. Rakitin.<sup>\*c</sup>

*a P. N. Lebedev Physical Institute of the Russian Academy of Sciences, 53 Leninskiy Prospect, 119991 Moscow, Russia*

*b Bauman Moscow State Technical University, 5/1 2-ya Baumanskaya Str., 105005 Moscow, Russia*

*c N. D. Zelinsky Institute of Organic Chemistry, Russian Academy of Sciences, Leninsky prospect, 47, Moscow, 119991, Russia.*

*d D. I. Mendeleev University of Chemical Technology of Russia, Miusskaya Pl. 9, 124047 Moscow, Russia*

*e Skoltech Center for Energy Science and Technology, Skolkovo Institute of Science and Technology, 121205 Moscow, Russia*

*f A.N. Frumkin Institute of Physical Chemistry and Electrochemistry, Russian Academy of Sciences, Leninsky Prospect 31, Bld. 4, 119071 Moscow, Russia*

### Table of contents:

|                                                                         |            |
|-------------------------------------------------------------------------|------------|
| <b>SI-1</b> NMR spectra .....                                           | <b>S2</b>  |
| <b>SI-2</b> X-ray crystallographic data and refinement details.....     | <b>S11</b> |
| <b>SI-3</b> CV measurements.....                                        | <b>S26</b> |
| <b>SI-4.</b> Photophysical parameters.....                              | <b>S27</b> |
| <b>SI-5.</b> Quantum-chemical calculations.....                         | <b>S34</b> |
| <b>SI-6</b> Comparison of data reported for sky-blue TADF emitters..... | <b>S35</b> |
| <b>SI-7</b> EQE of devices with TADF emitters.....                      | <b>S36</b> |
| <b>SI-8.</b> References.....                                            | <b>S37</b> |

# SI-1 NMR spectra

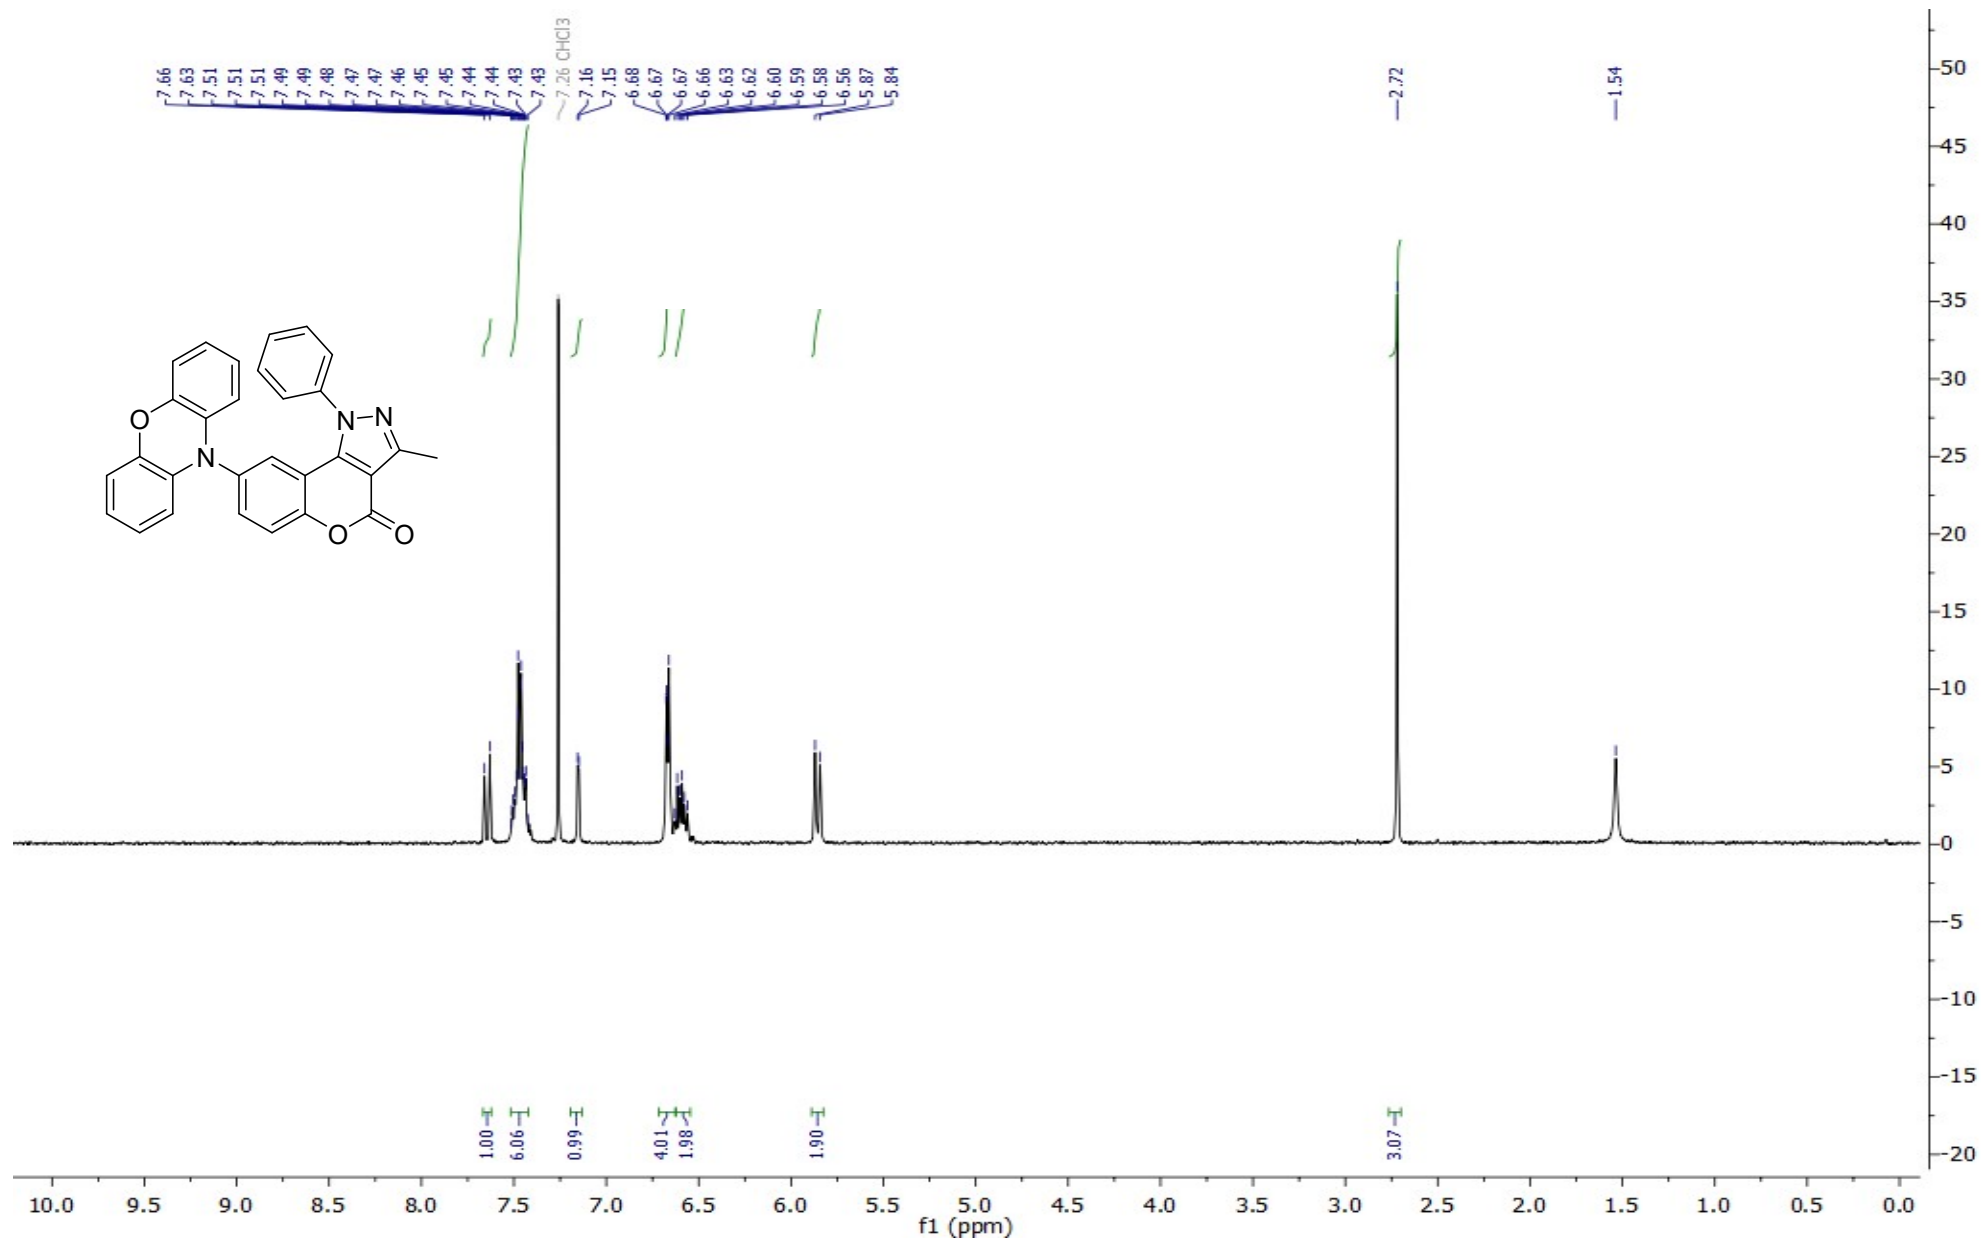

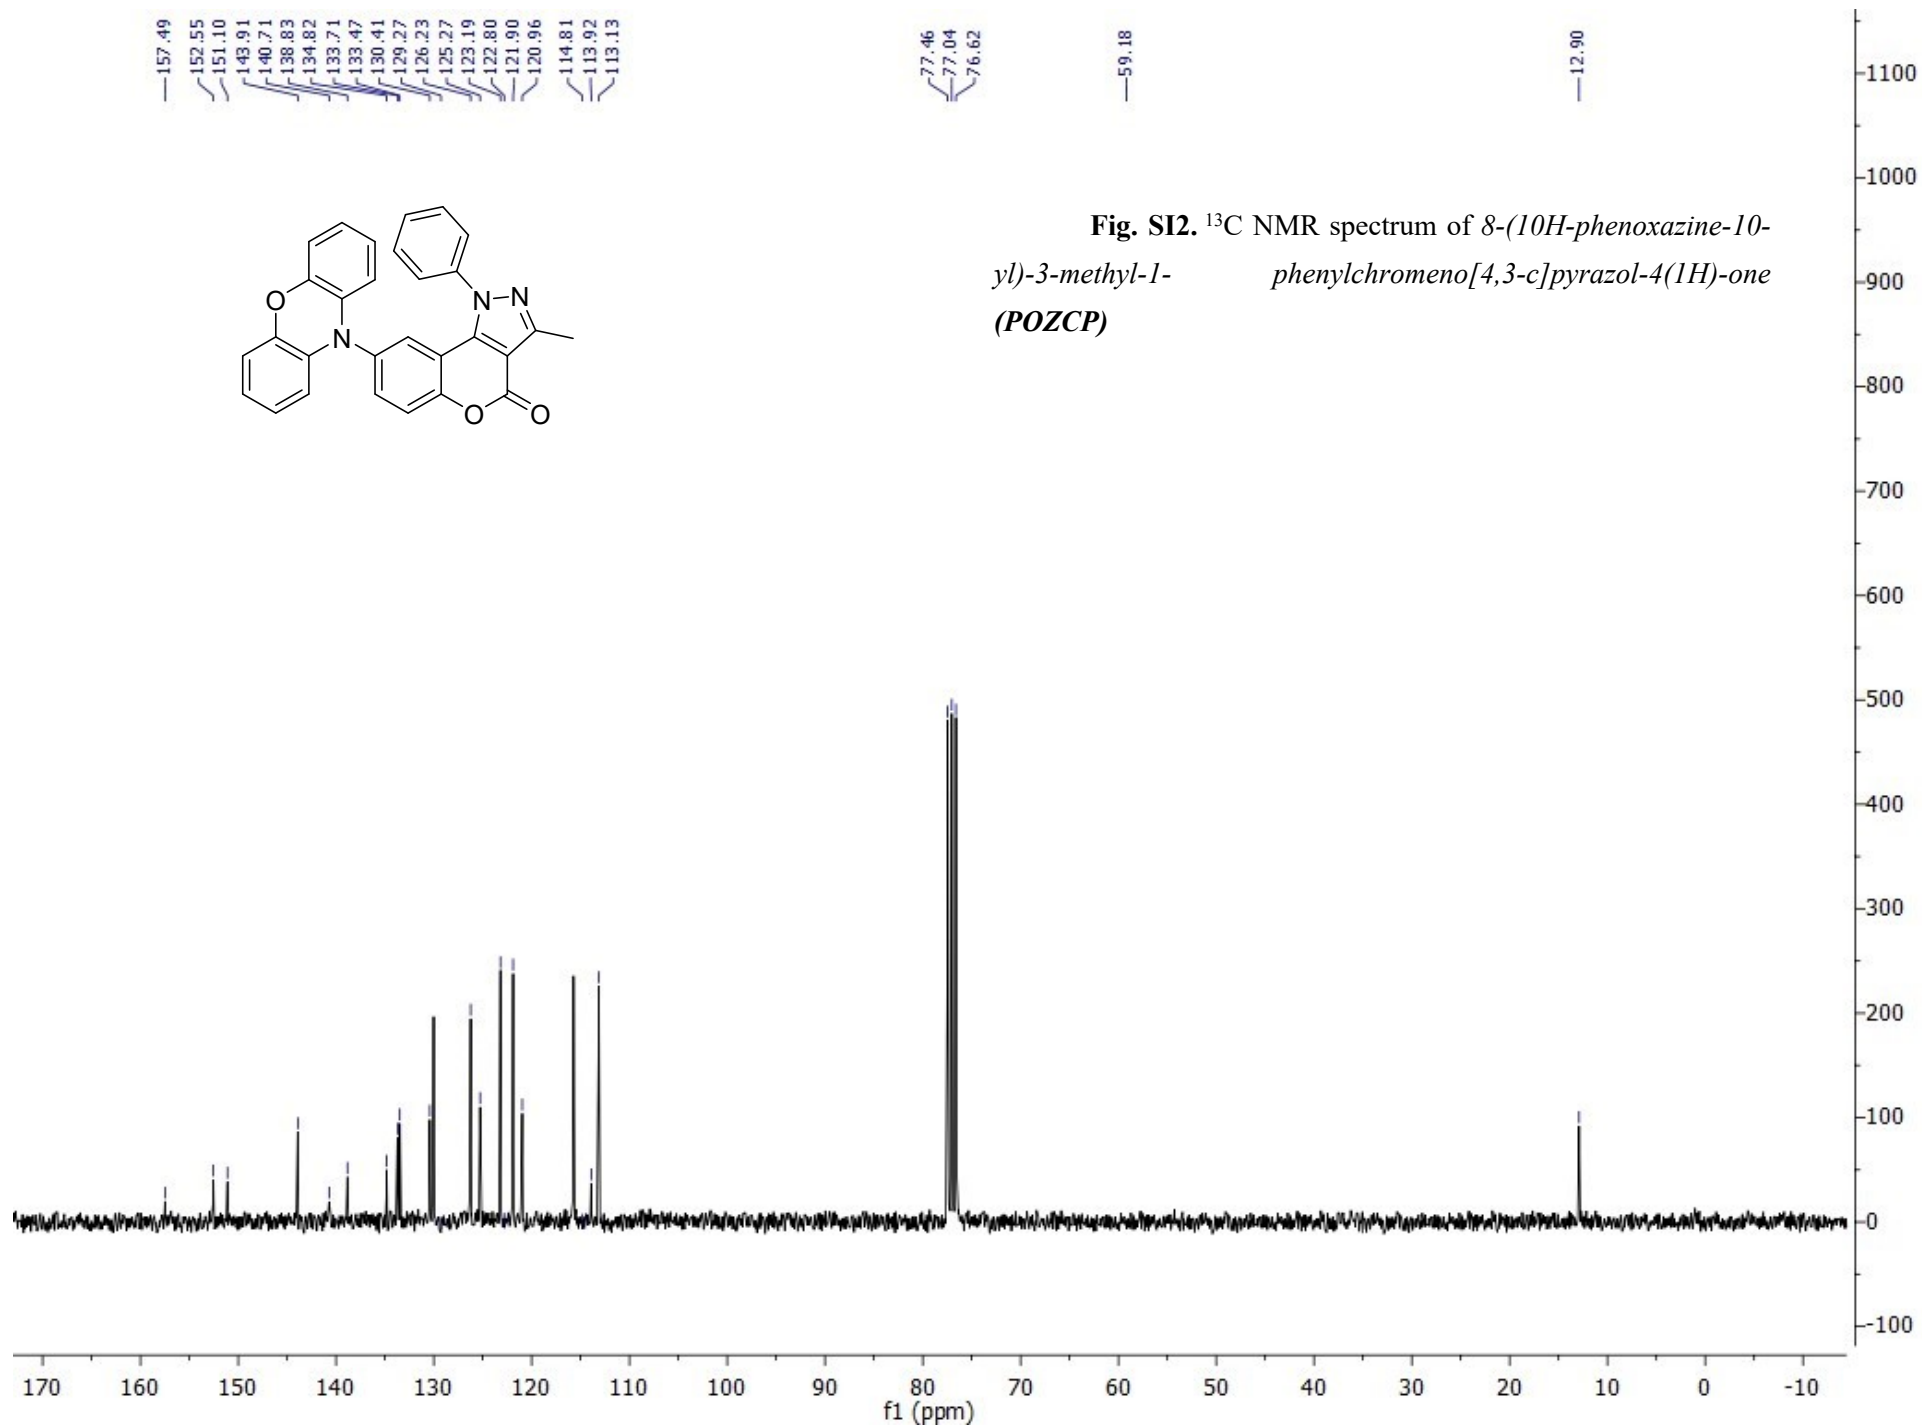

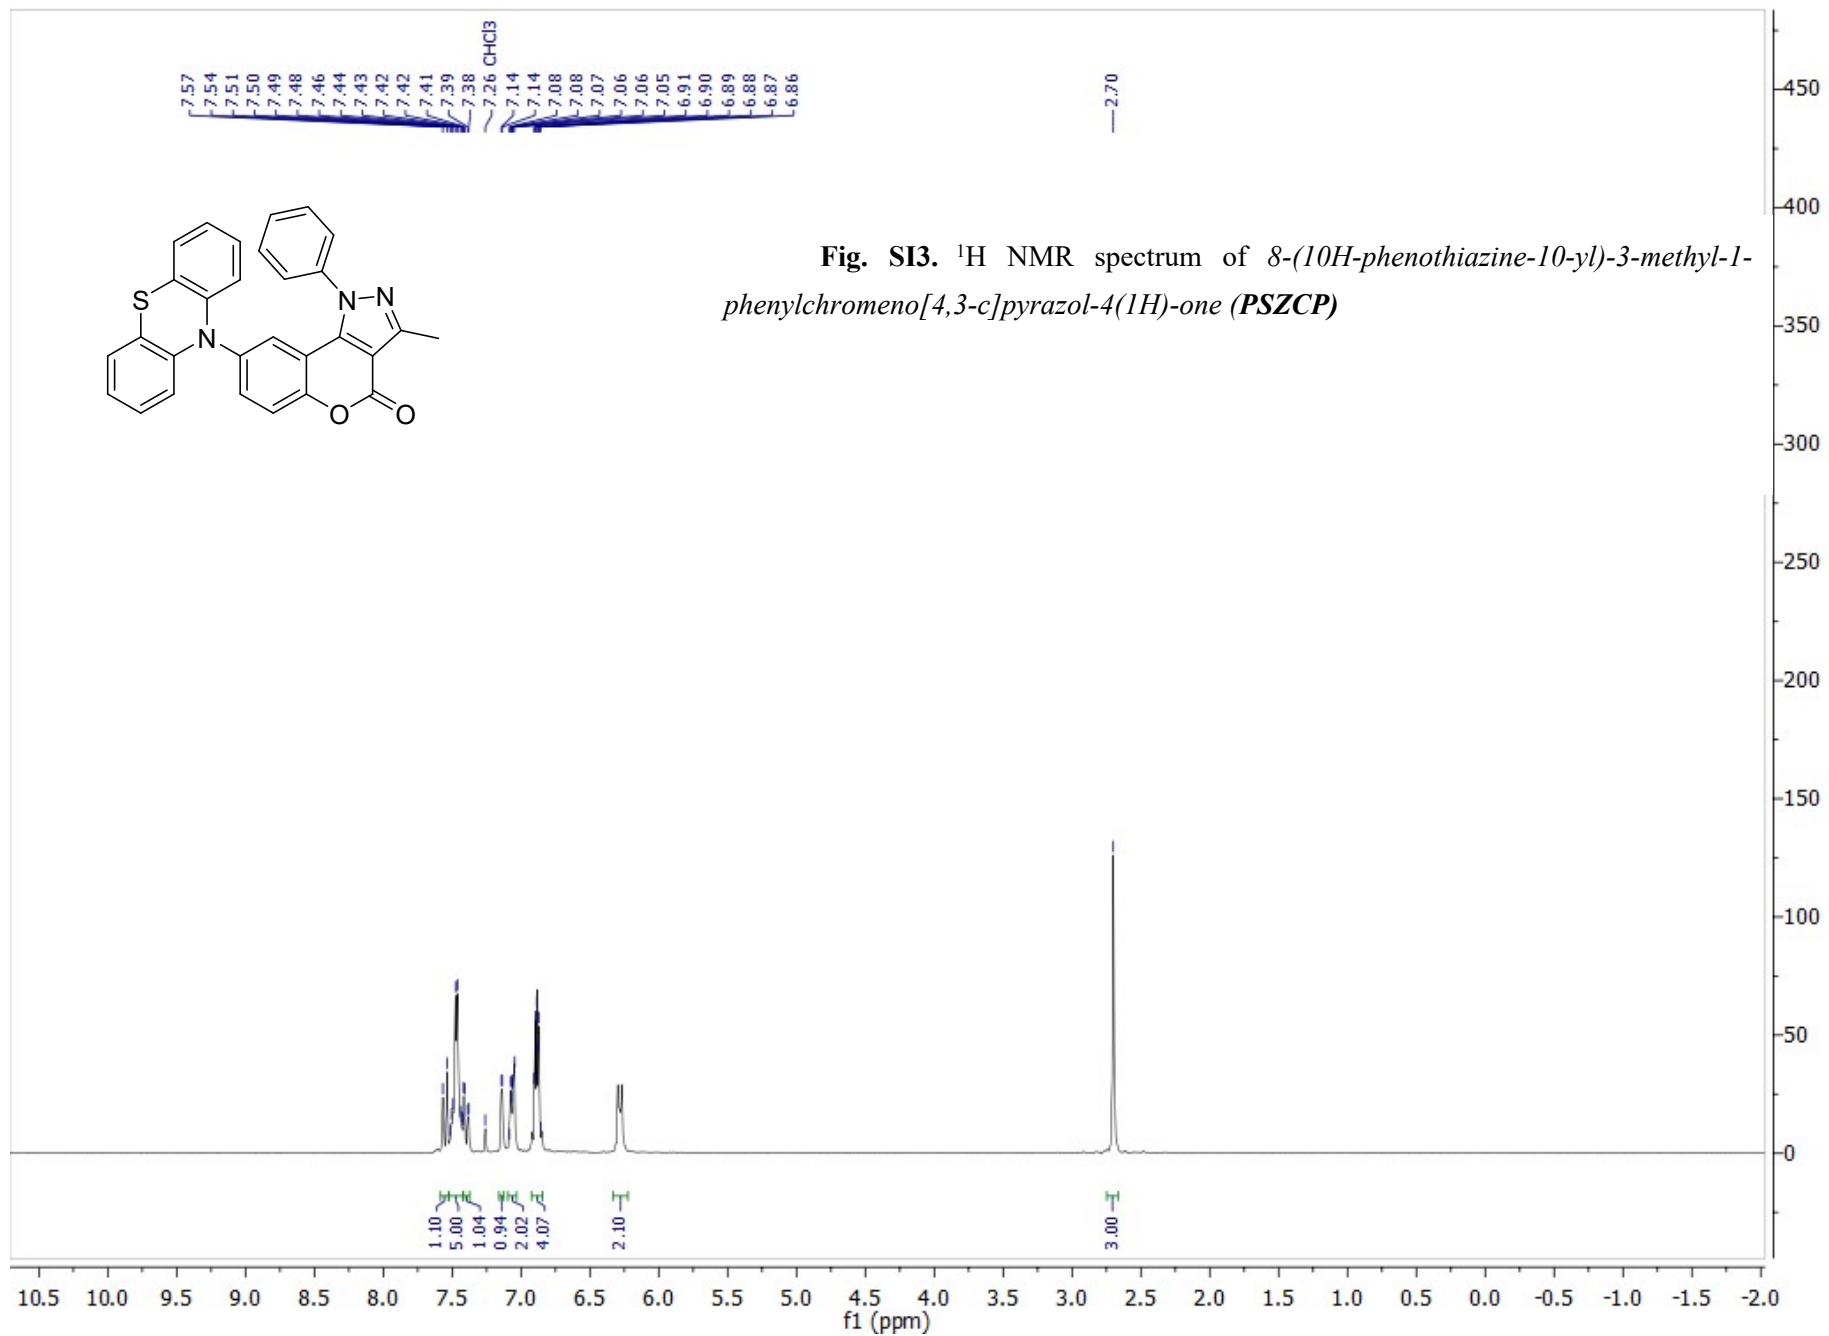

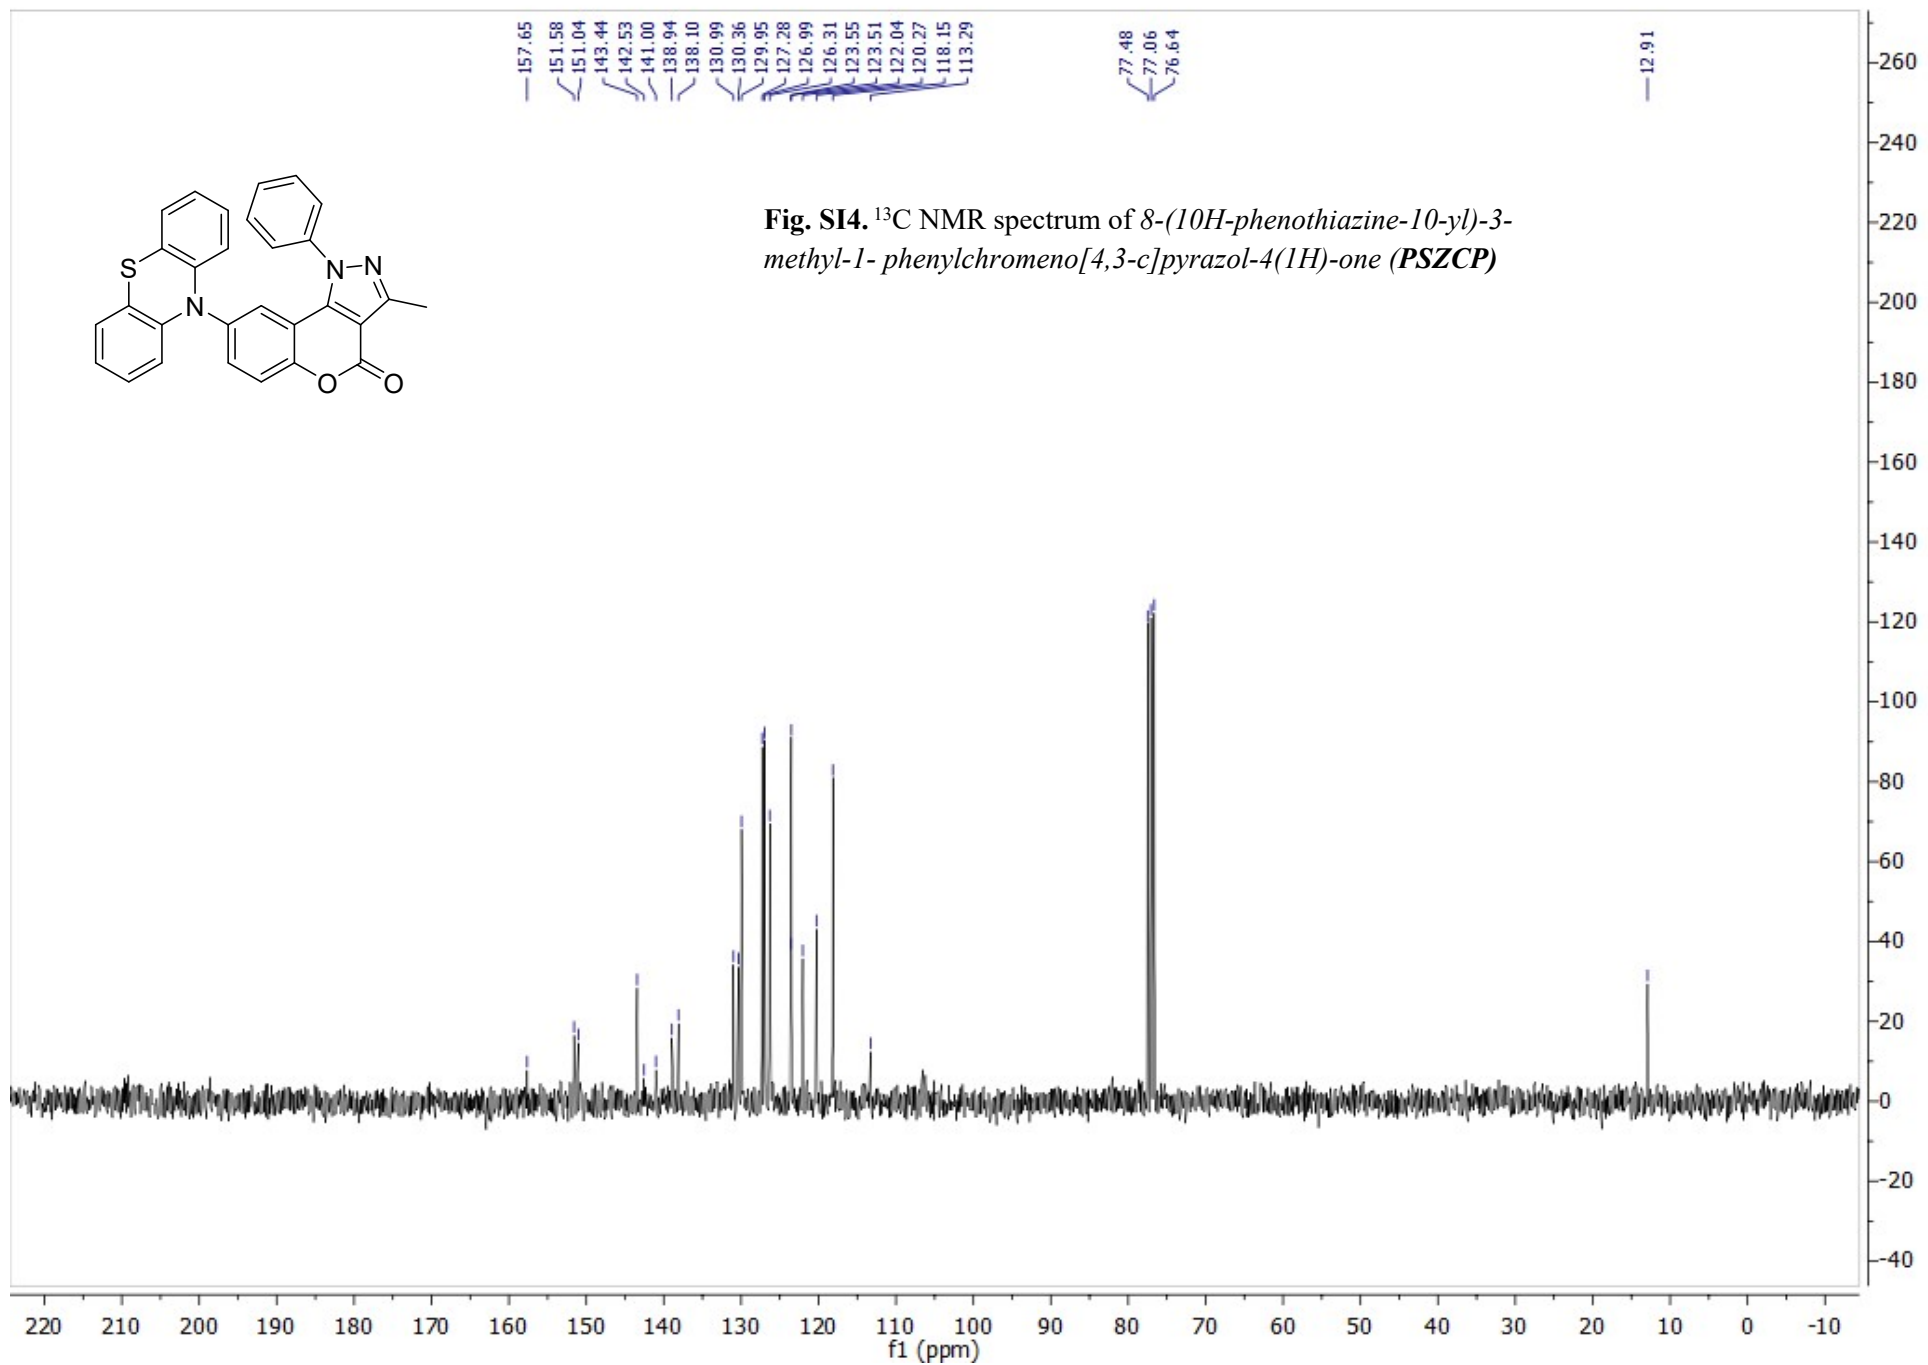

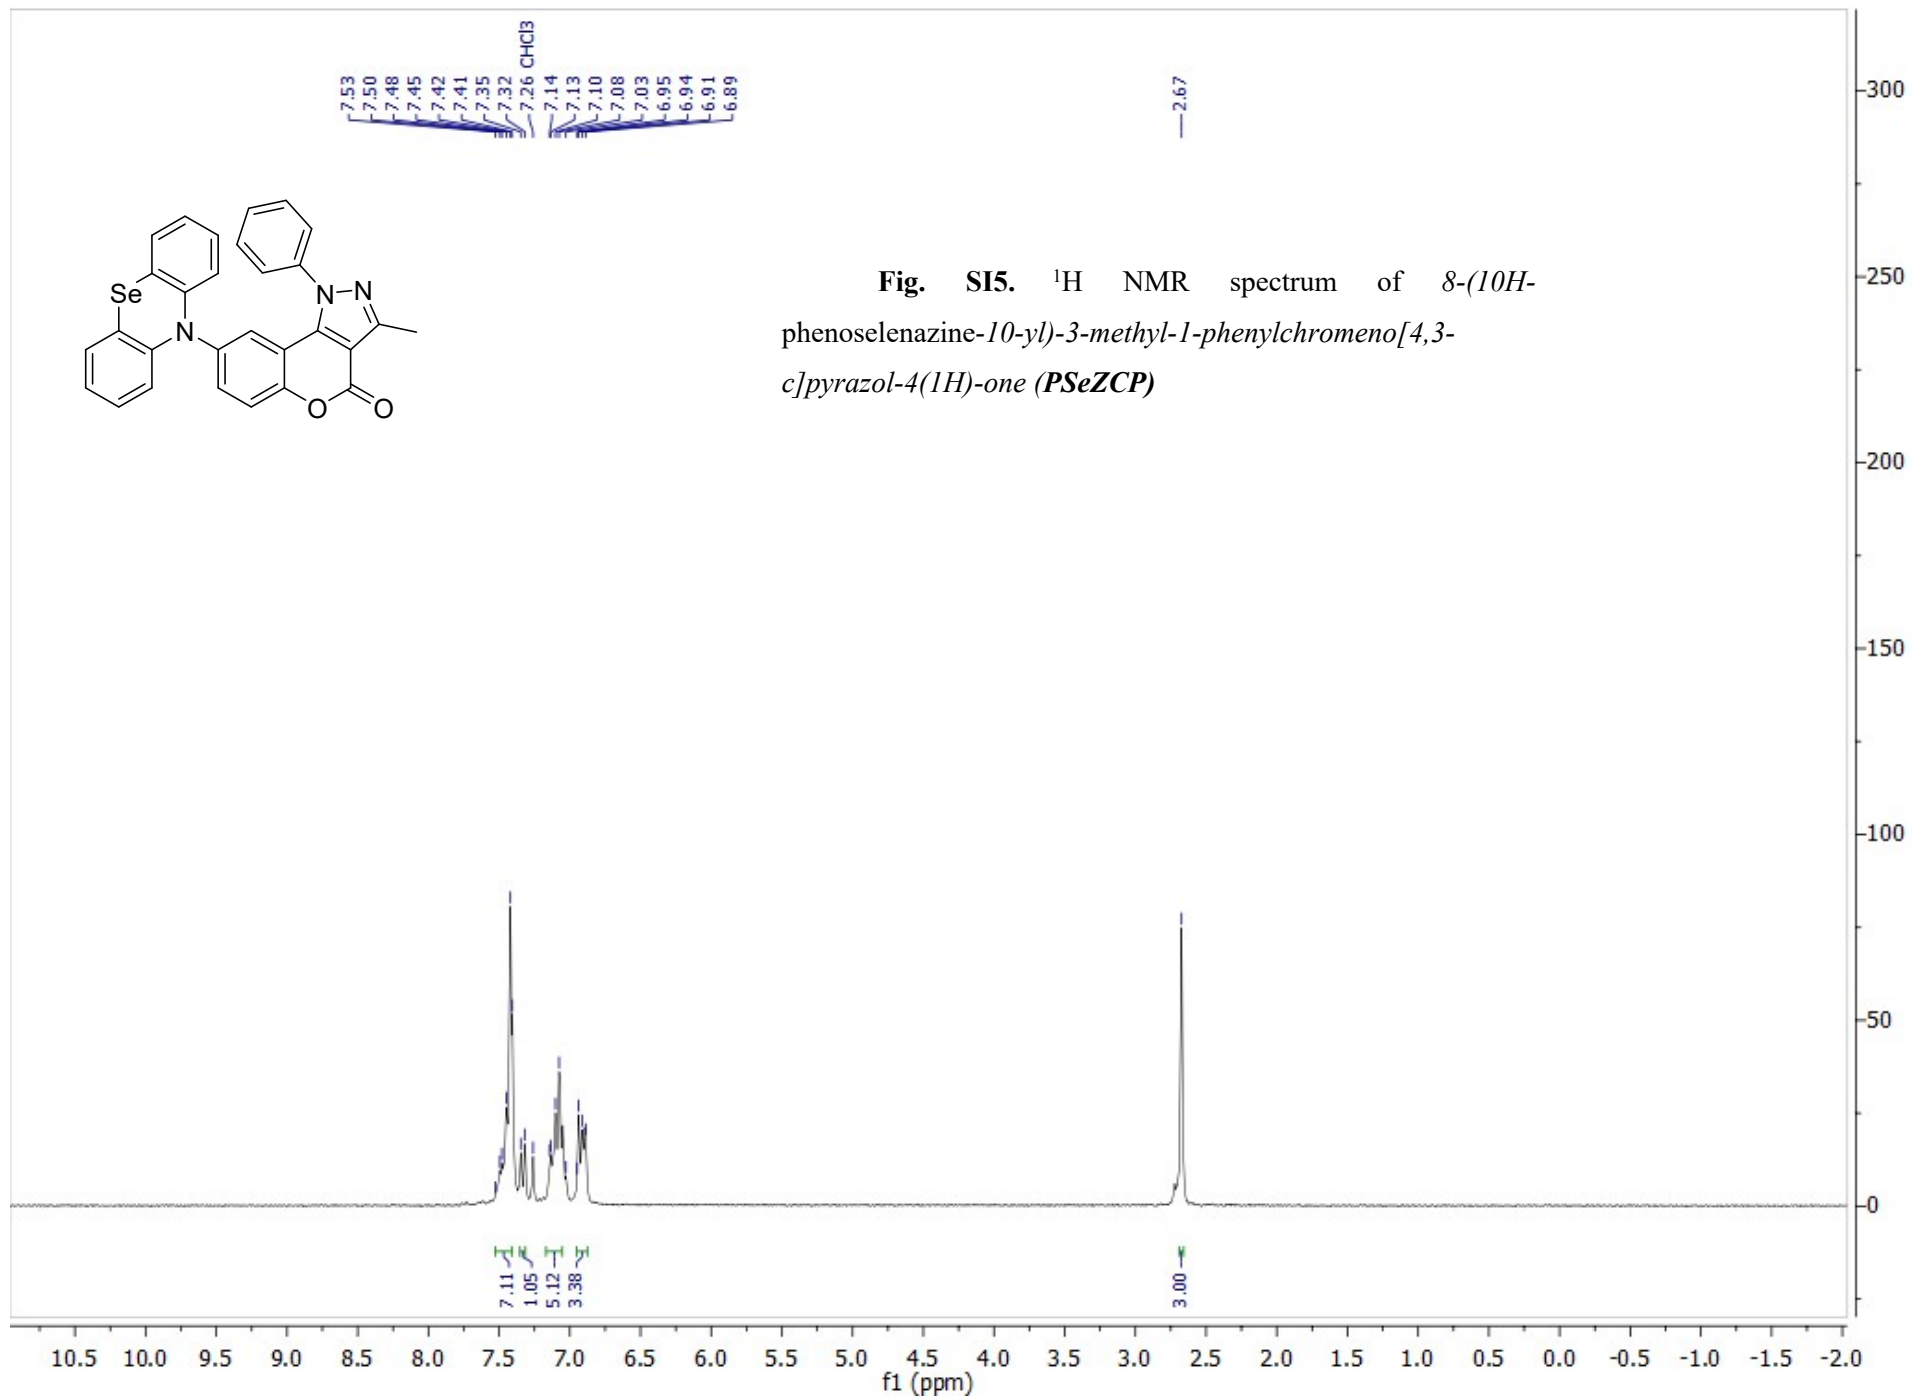

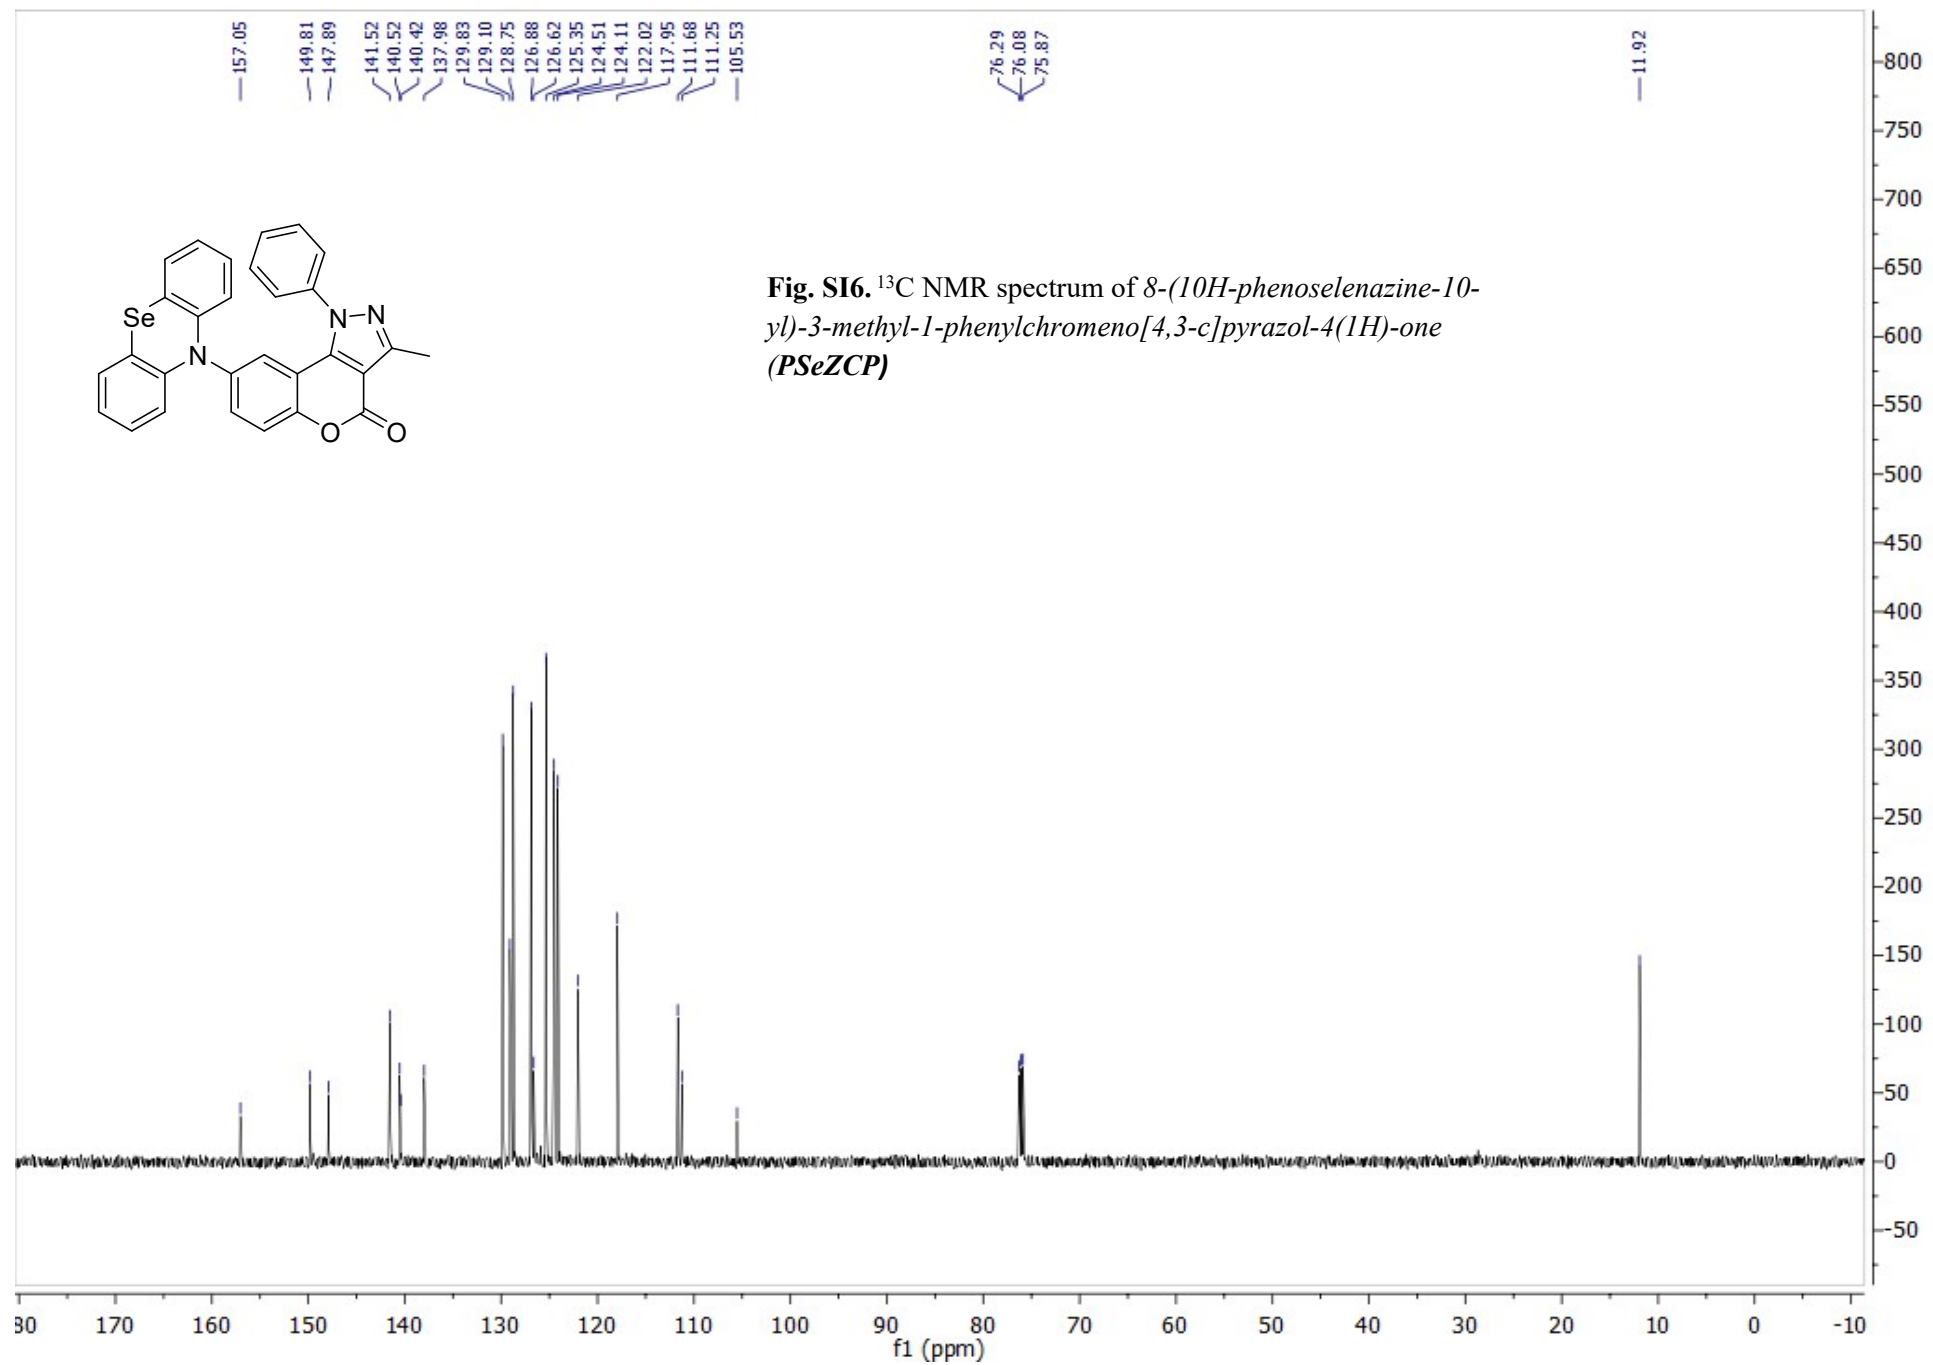

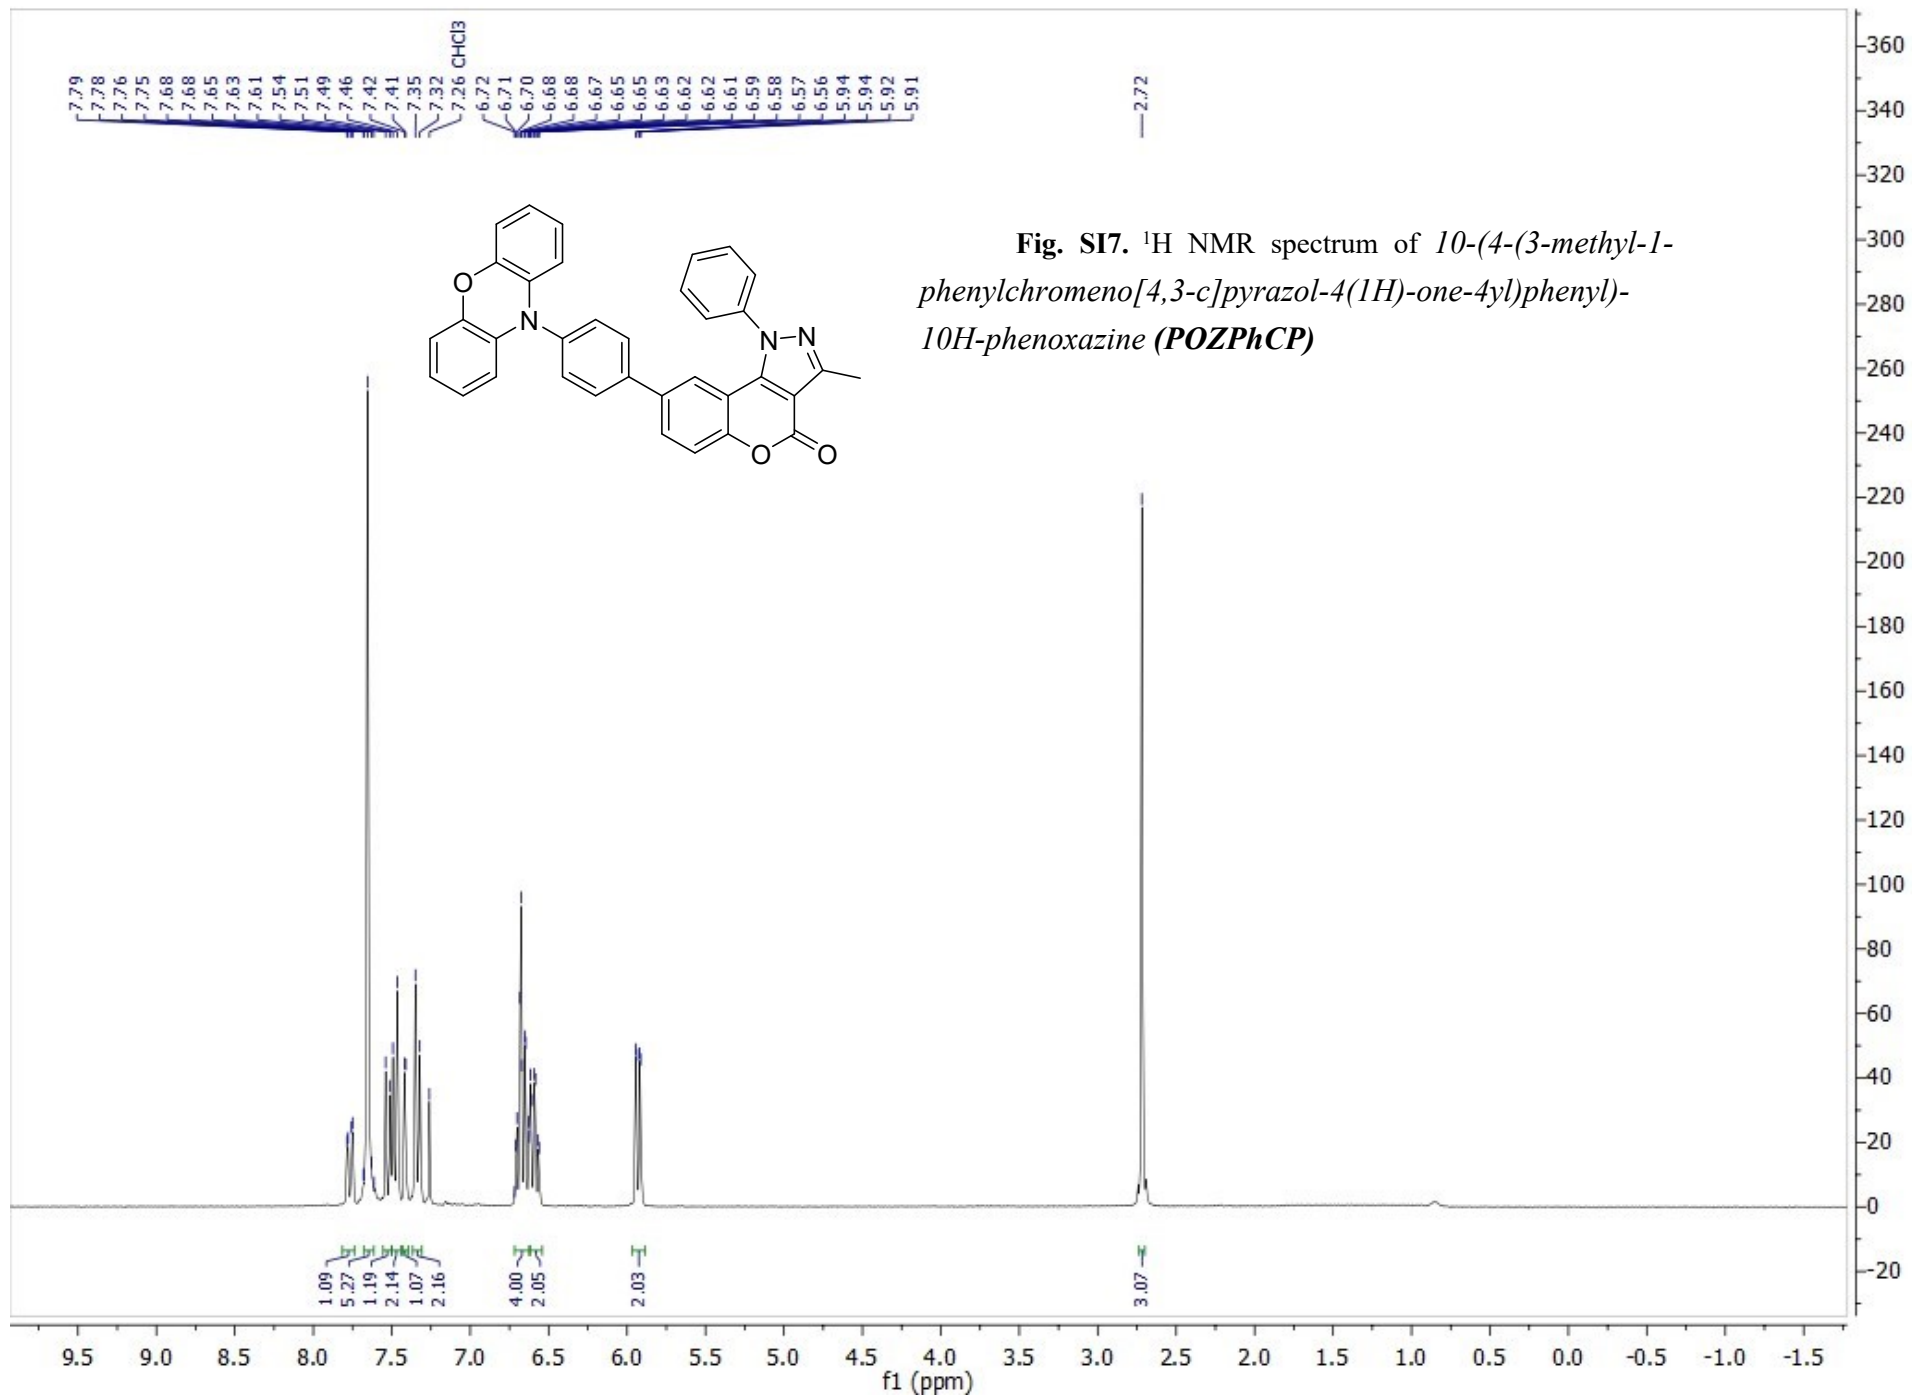

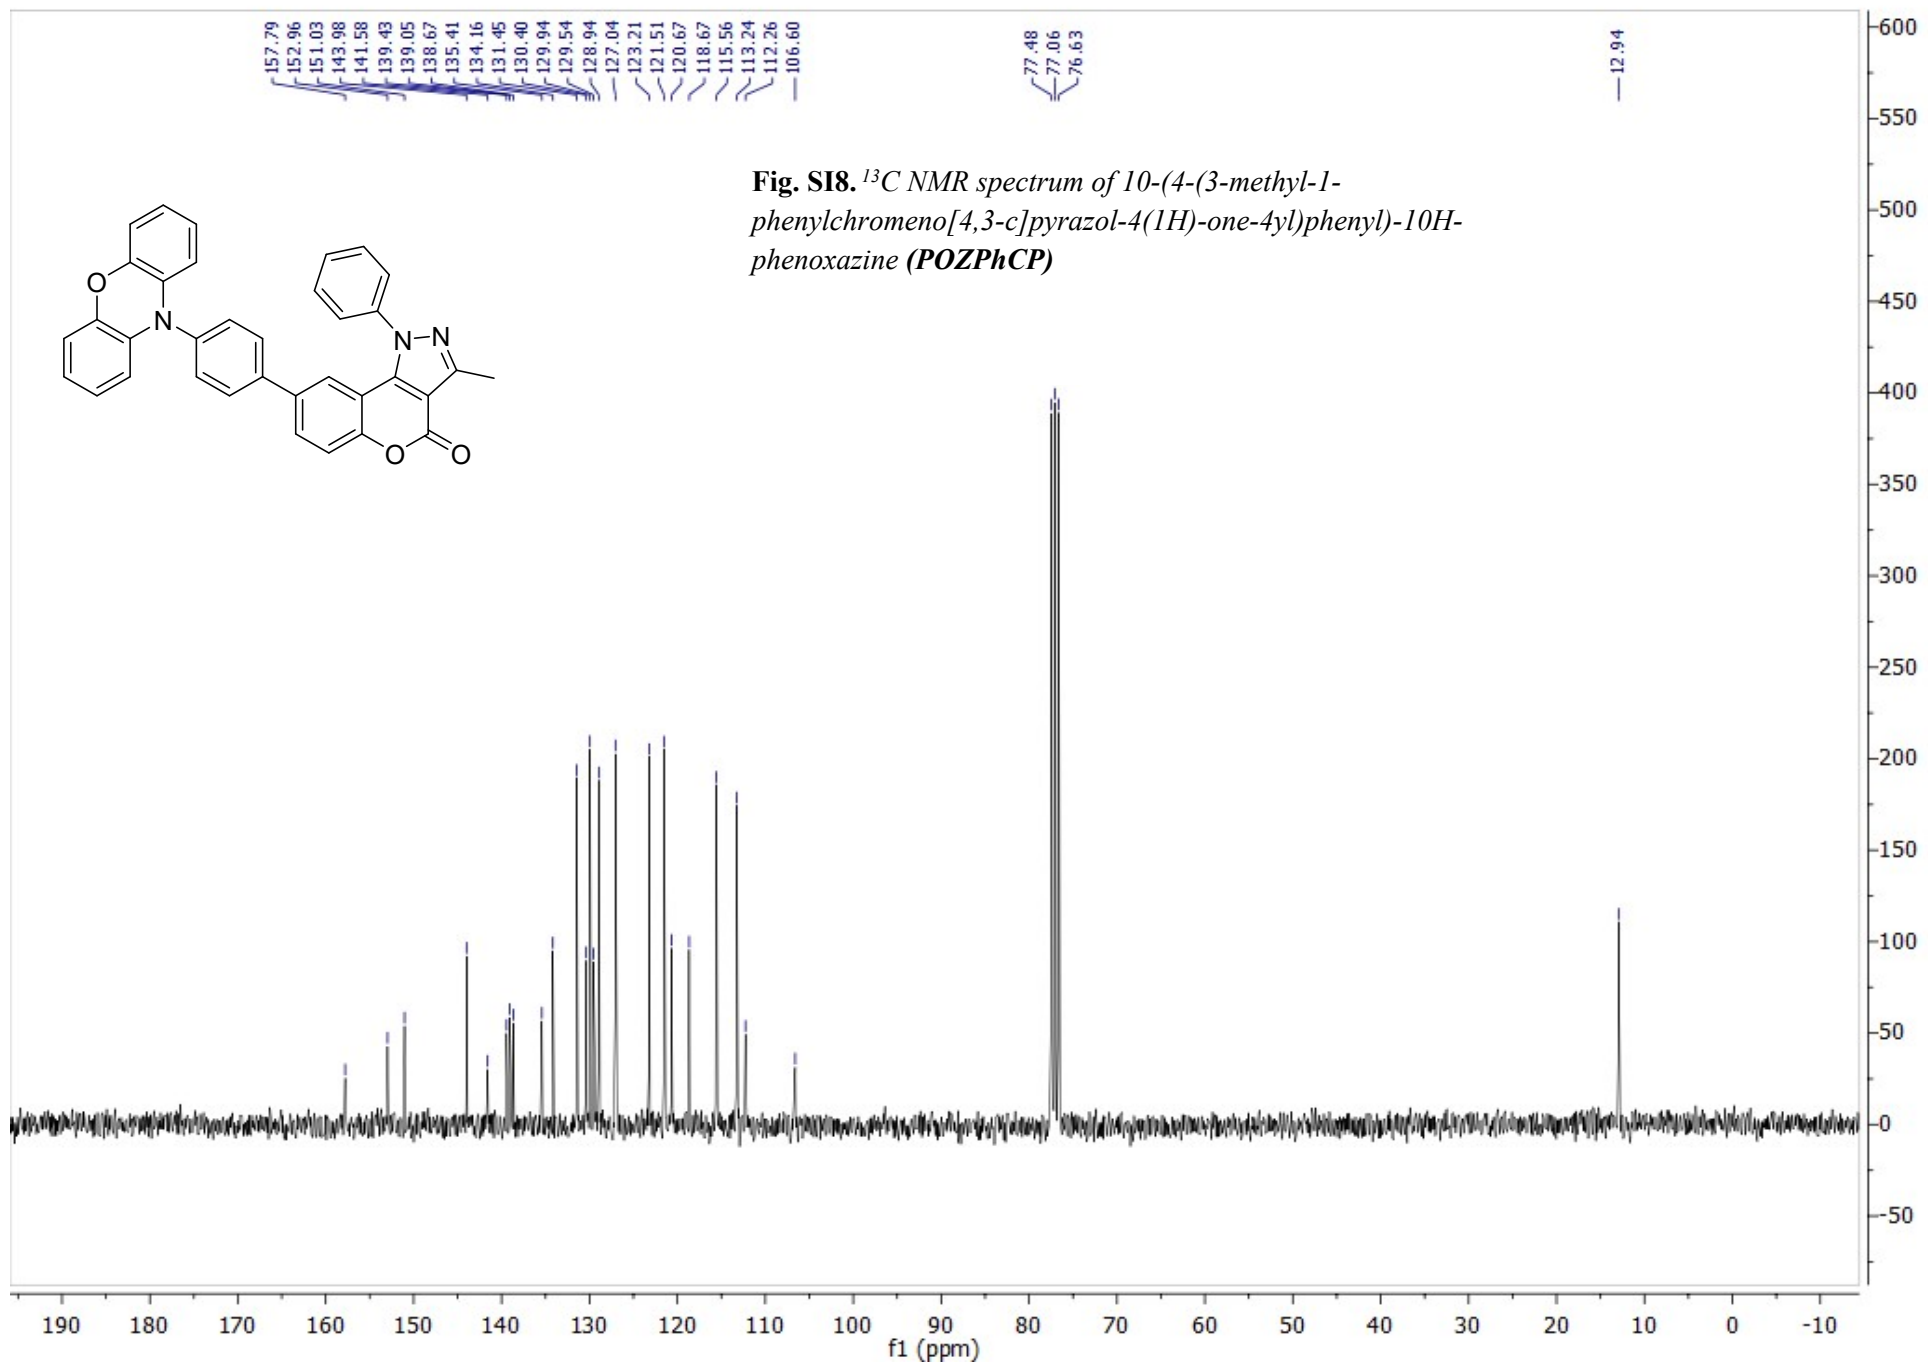

## Molecular design

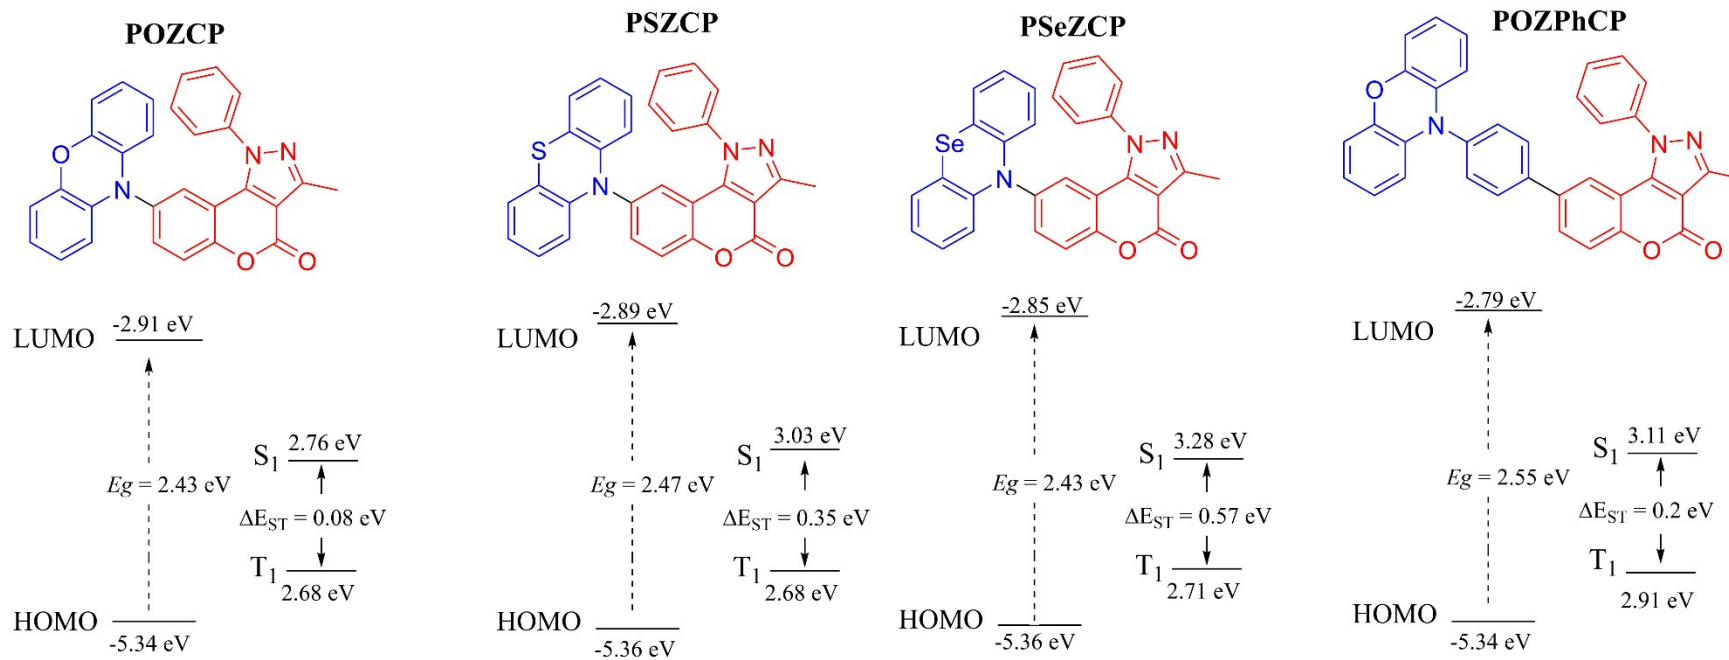

Chemical structures (upper), HOMO and LUMO distributions, and measured singlet ( $S_1$ ) and triplet ( $T_1$ ) energy levels (lower) for D-A molecules (**POZCP**, **PSZCP**, **PSeZCP** and **POZPhCP**).

## SI-2 X-ray crystallographic data and refinement details.

Crystal data, data collection and structure refinement details are summarized in **Table SI1**.

**Table SI1** Crystal data for **POZCP**, **PSZCP**, **PSeZCP**, **POZPhCP**

| <b>Compound</b>                              | <b>POZCP</b>                                                  | <b>PSZCP</b>                                                    | <b>PSeZCP</b>                                                    | <b>POZPhCP</b>                                                |
|----------------------------------------------|---------------------------------------------------------------|-----------------------------------------------------------------|------------------------------------------------------------------|---------------------------------------------------------------|
| Empirical formula                            | C <sub>29</sub> H <sub>19</sub> N <sub>3</sub> O <sub>3</sub> | C <sub>29</sub> H <sub>19</sub> N <sub>3</sub> O <sub>2</sub> S | C <sub>29</sub> H <sub>19</sub> N <sub>3</sub> O <sub>2</sub> Se | C <sub>35</sub> H <sub>23</sub> N <sub>3</sub> O <sub>3</sub> |
| Formula weight                               | 457.47                                                        | 473.53                                                          | 520.43                                                           | 533.56                                                        |
| Temperature, K                               | 100.00(10)                                                    | 100.00(10)                                                      | 100.00(10)                                                       | 100.00(10)                                                    |
| Wavelength, Å                                | 1.54184                                                       | 1.54184                                                         | 1.54184                                                          | 1.54184                                                       |
| Crystal system                               | Monoclinic                                                    | Monoclinic                                                      | Triclinic                                                        | Monoclinic                                                    |
| Space group                                  | <i>P2<sub>1</sub>/c</i>                                       | <i>P2<sub>1</sub>/c</i>                                         | <i>P</i> $\bar{1}$                                               | <i>P2<sub>1</sub>/n</i>                                       |
| Unit cell dimensions                         |                                                               |                                                                 |                                                                  |                                                               |
| a, Å                                         | 10.00170(10)                                                  | 17.8600(3)                                                      | 8.80580(10)                                                      | 14.9667(3)                                                    |
| b, Å                                         | 102.1270(10)                                                  | 9.42620(10)                                                     | 10.48780(10)                                                     | 9.11850(10)                                                   |
| c, Å                                         | 6.73430(10)                                                   | 13.9246(3)                                                      | 13.7387(2)                                                       | 18.6135(3)                                                    |
| Volume, Å <sup>3</sup>                       | 2151.48(5)                                                    | 2229.94(7)                                                      | 1128.87(3)                                                       | 2532.45(7)                                                    |
| Z                                            | 4                                                             | 4                                                               | 2                                                                | 4                                                             |
| Density (calcd.), g·cm <sup>-3</sup>         | 1.412                                                         | 1.410                                                           | 1.531                                                            | 1.399                                                         |
| Absorption coefficient, mm <sup>-1</sup>     | 0.753                                                         | 1.564                                                           | 2.524                                                            | 0.725                                                         |
| F(000)                                       | 952                                                           | 984                                                             | 528                                                              | 1112                                                          |
| Crystal size, mm <sup>3</sup>                | 0.5 x 0.3 x 0.2                                               | 0.444 x 0.345 x 0.121                                           | 0.28 x 0.09 x 0.07                                               | 0.287 x 0.228 x 0.055                                         |
| Theta range for data collection              | 2.705 to 80.144°                                              | 2.601 to 79.751°                                                | 3.359 to 80.309°                                                 | 3.653 to 79.936°                                              |
| Reflections collected                        | 25650                                                         | 8656                                                            | 2984                                                             | 55392                                                         |
| Independent [R <sub>int</sub> ]              | 4635 [0.0264]                                                 | 8656                                                            | 4901 [0.0360]                                                    | 5392                                                          |
| Completeness to theta = 67.684°              | 99.9 %                                                        | 100.0 %                                                         | 100.0 %                                                          | 99.5 %                                                        |
| Data / restraints / parameters               | 4635 / 57 / 360                                               | 8656 / 0 / 318                                                  | 4901 / 0 / 317                                                   | 5392 / 0 / 372                                                |
| Goodness-of-fit on F <sup>2</sup>            | 1.066                                                         | 1.067                                                           | 1.041                                                            | 1.064                                                         |
| R <sub>1</sub> / wR <sub>2</sub> for I>2s(I) | 0.0400 / 0.1074                                               | 0.0444 / 0.1294                                                 | 0.0309 / 0.0822                                                  | 0.0627 / 0.1716                                               |

|                                         |                  |                  |                  |                  |
|-----------------------------------------|------------------|------------------|------------------|------------------|
| $R_1 / wR_2$ (all reflections)          | 0.0418 / 0.1089  | 0.0454 / 0.1303  | 0.0316 / 0.0827  | 0.0726 / 0.1792  |
| $R_{\max}/r_{\min}$ , e.Å <sup>-3</sup> | 0.180 and -0.179 | 0.248 and -0.479 | 0.736 and -0.605 | 0.361 and -0.206 |
| CCDC number                             | 2474440          | 2474441          | 2474212          | 2474213          |

## Crystal structure of POZCP

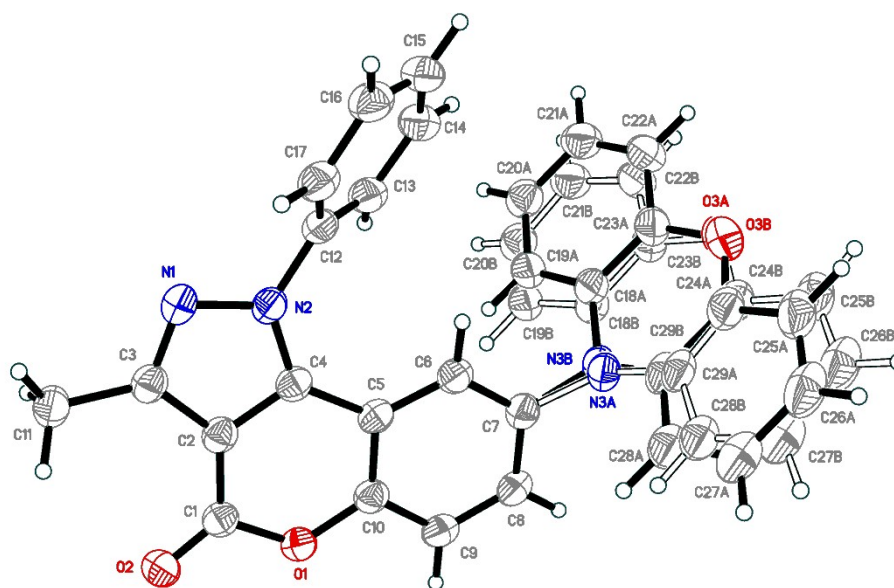

**Figure S11.** The structure of **POZCP** with numeration of the non-hydrogen atoms. Thermal ellipsoids are set to the 50% probability level.

**Table S12.** Selected bond length (Å) and angle (°) in the crystals for compound **POZCP**.

| Bond length (Å) |            |               |            |
|-----------------|------------|---------------|------------|
| O(1)-C(1)       | 1.3872(15) | O(3A)-C(24A)  | 1.3844(19) |
| O(1)-C(10)      | 1.3816(14) | C(18A)-C(19A) | 1.3932(19) |
| N(1)-N(2)       | 1.3797(14) | C(18A)-C(23A) | 1.3965(18) |
| N(1)-C(3)       | 1.3235(16) | C(19A)-C(20A) | 1.3880(19) |
| C(1)-O(2)       | 1.2055(15) | C(20A)-C(21A) | 1.383(2)   |
| C(1)-C(2)       | 1.4405(17) | C(21A)-C(22A) | 1.387(2)   |
| N(2)-C(4)       | 1.3531(15) | C(22A)-C(23A) | 1.379(2)   |
| N(2)-C(12)      | 1.4376(16) | C(24A)-C(25A) | 1.386(2)   |
| C(2)-C(3)       | 1.4142(16) | C(24A)-C(29A) | 1.396(2)   |
| C(2)-C(4)       | 1.3843(17) | C(25A)-C(26A) | 1.385(3)   |
| C(3)-C(11)      | 1.4962(17) | C(26A)-C(27A) | 1.381(2)   |
| C(4)-C(5)       | 1.4498(16) | C(27A)-C(28A) | 1.394(2)   |
| C(5)-C(6)       | 1.3938(17) | C(28A)-C(29A) | 1.391(2)   |
| C(5)-C(10)      | 1.4071(17) | N(3B)-C(18B)  | 1.416(3)   |
| C(6)-C(7)       | 1.3848(17) | N(3B)-C(29B)  | 1.418(3)   |
| C(7)-C(8)       | 1.3943(17) | O(3B)-C(23B)  | 1.385(4)   |
| C(7)-N(3A)      | 1.4369(16) | O(3B)-C(24B)  | 1.375(5)   |
| C(7)-N(3B)      | 1.440(3)   | C(18B)-C(19B) | 1.394(3)   |
| C(8)-C(9)       | 1.3861(18) | C(18B)-C(23B) | 1.395(3)   |
| C(9)-C(10)      | 1.3883(17) | C(19B)-C(20B) | 1.388(3)   |

|              |            |               |          |
|--------------|------------|---------------|----------|
| C(12)-C(13)  | 1.3872(18) | C(20B)-C(21B) | 1.383(3) |
| C(12)-C(17)  | 1.3863(17) | C(21B)-C(22B) | 1.388(3) |
| C(13)-C(14)  | 1.3890(18) | C(22B)-C(23B) | 1.379(3) |
| C(14)-C(15)  | 1.393(2)   | C(24B)-C(25B) | 1.386(3) |
| C(15)-C(16)  | 1.386(2)   | C(24B)-C(29B) | 1.395(3) |
| C(16)-C(17)  | 1.3870(19) | C(25B)-C(26B) | 1.385(4) |
| N(3A)-C(18A) | 1.4187(17) | C(26B)-C(27B) | 1.381(4) |
| N(3A)-C(29A) | 1.4193(16) | C(27B)-C(28B) | 1.394(3) |
| O(3A)-C(23A) | 1.3855(17) | C(28B)-C(29B) | 1.393(3) |

| Angles (°)      |            |                      |            |
|-----------------|------------|----------------------|------------|
| C(10)-O(1)-C(1) | 123.04(9)  | C(24A)-O(3A)-C(23A)  | 116.90(11) |
| C(3)-N(1)-N(2)  | 106.17(10) | C(19A)-C(18A)-N(3A)  | 122.03(12) |
| O(1)-C(1)-C(2)  | 114.97(10) | C(19A)-C(18A)-C(23A) | 118.04(13) |
| O(2)-C(1)-O(1)  | 117.14(11) | C(23A)-C(18A)-N(3A)  | 119.87(12) |
| O(2)-C(1)-C(2)  | 127.88(12) | C(20A)-C(19A)-C(18A) | 120.80(13) |
| N(1)-N(2)-C(12) | 118.59(9)  | C(21A)-C(20A)-C(19A) | 120.40(14) |
| C(4)-N(2)-N(1)  | 111.10(10) | C(20A)-C(21A)-C(22A) | 119.28(14) |
| C(4)-N(2)-C(12) | 130.31(10) | C(23A)-C(22A)-C(21A) | 120.38(14) |
| C(3)-C(2)-C(1)  | 131.14(11) | O(3A)-C(23A)-C(18A)  | 121.82(13) |
| C(4)-C(2)-C(1)  | 122.81(11) | C(22A)-C(23A)-O(3A)  | 117.09(13) |
| C(4)-C(2)-C(3)  | 106.04(10) | C(22A)-C(23A)-C(18A) | 121.07(13) |
| N(1)-C(3)-C(2)  | 110.12(11) | O(3A)-C(24A)-C(25A)  | 116.56(14) |
| N(1)-C(3)-C(11) | 121.33(11) | O(3A)-C(24A)-C(29A)  | 122.29(13) |
| C(2)-C(3)-C(11) | 128.51(11) | C(25A)-C(24A)-C(29A) | 121.14(15) |
| N(2)-C(4)-C(2)  | 106.56(10) | C(26A)-C(25A)-C(24A) | 119.73(15) |
| N(2)-C(4)-C(5)  | 132.51(11) | C(27A)-C(26A)-C(25A) | 120.11(14) |
| C(2)-C(4)-C(5)  | 120.93(11) | C(26A)-C(27A)-C(28A) | 119.96(16) |
| C(6)-C(5)-C(4)  | 127.58(11) | C(29A)-C(28A)-C(27A) | 120.74(14) |
| C(6)-C(5)-C(10) | 117.68(11) | C(24A)-C(29A)-N(3A)  | 119.47(13) |
| C(10)-C(5)-C(4) | 114.73(11) | C(28A)-C(29A)-N(3A)  | 122.22(12) |
| C(7)-C(6)-C(5)  | 121.00(11) | C(28A)-C(29A)-C(24A) | 118.30(13) |
| C(6)-C(7)-C(8)  | 120.56(12) | C(18B)-N(3B)-C(7)    | 101.0(11)  |
| C(6)-C(7)-N(3A) | 118.58(11) | C(18B)-N(3B)-C(29B)  | 117.4(2)   |
| C(6)-C(7)-N(3B) | 118.2(2)   | C(29B)-N(3B)-C(7)    | 139.4(15)  |
| C(8)-C(7)-N(3A) | 120.84(11) | C(24B)-O(3B)-C(23B)  | 117.4(3)   |
| C(8)-C(7)-N(3B) | 120.4(2)   | C(19B)-C(18B)-N(3B)  | 121.6(4)   |
| C(9)-C(8)-C(7)  | 119.26(11) | C(19B)-C(18B)-C(23B) | 118.0(3)   |
| C(8)-C(9)-C(10) | 120.05(11) | C(23B)-C(18B)-N(3B)  | 120.3(3)   |
| O(1)-C(10)-C(5) | 123.32(11) | C(20B)-C(19B)-C(18B) | 120.7(3)   |
| O(1)-C(10)-C(9) | 115.43(10) | C(21B)-C(20B)-C(19B) | 120.4(3)   |

|                     |            |                      |          |
|---------------------|------------|----------------------|----------|
| C(9)-C(10)-C(5)     | 121.25(11) | C(20B)-C(21B)-C(22B) | 119.2(3) |
| C(13)-C(12)-N(2)    | 119.62(11) | C(23B)-C(22B)-C(21B) | 120.3(3) |
| C(17)-C(12)-N(2)    | 118.83(11) | O(3B)-C(23B)-C(18B)  | 122.1(4) |
| C(17)-C(12)-C(13)   | 121.55(12) | C(22B)-C(23B)-O(3B)  | 116.6(6) |
| C(12)-C(13)-C(14)   | 118.83(12) | C(22B)-C(23B)-C(18B) | 121.1(3) |
| C(13)-C(14)-C(15)   | 120.28(13) | O(3B)-C(24B)-C(25B)  | 115.8(4) |
| C(16)-C(15)-C(14)   | 119.80(13) | O(3B)-C(24B)-C(29B)  | 123.0(3) |
| C(15)-C(16)-C(17)   | 120.54(13) | C(25B)-C(24B)-C(29B) | 121.2(3) |
| C(12)-C(17)-C(16)   | 118.89(13) | C(26B)-C(25B)-C(24B) | 119.8(3) |
| C(18A)-N(3A)-C(7)   | 116.59(10) | C(27B)-C(26B)-C(25B) | 120.0(4) |
| C(18A)-N(3A)-C(29A) | 116.92(11) | C(26B)-C(27B)-C(28B) | 120.0(4) |
| C(29A)-N(3A)-C(7)   | 116.90(11) | C(29B)-C(28B)-C(27B) | 120.7(3) |

### Crystal structure of PSZCP

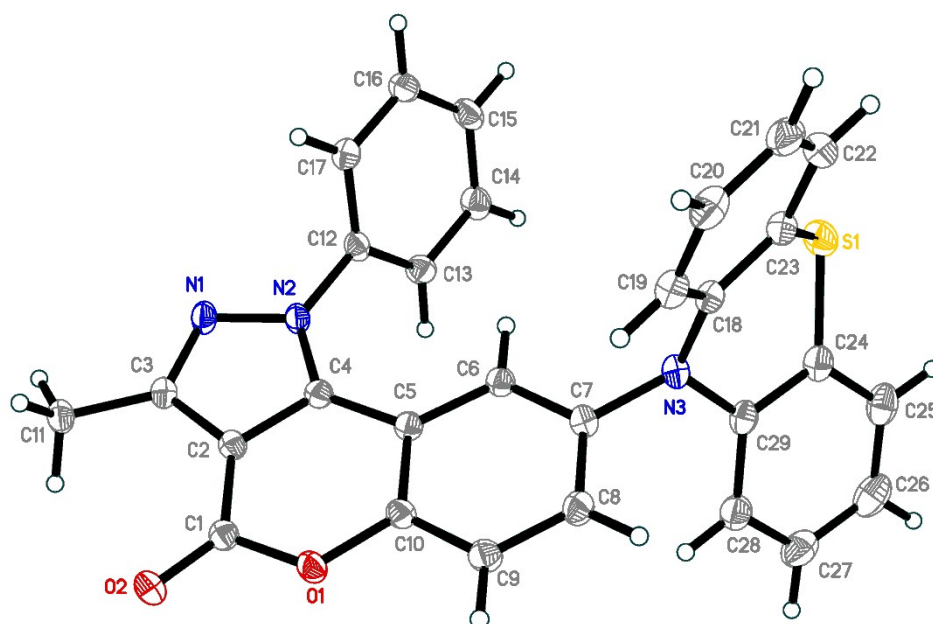

**Figure SI2.** The structure of **PSZCP** with numeration of the non-hydrogen atoms. Thermal ellipsoids are set to the 50% probability level.

**Table SI3.** Selected bond length (Å) and angle (°) in the crystals for compound **PSZCP**.

| Bond length (Å) |            |             |          |
|-----------------|------------|-------------|----------|
| S(1)-C(23)      | 1.7611(19) | C(8)-C(9)   | 1.385(2) |
| S(1)-C(24)      | 1.7624(19) | C(9)-C(10)  | 1.391(2) |
| O(1)-C(1)       | 1.3861(19) | C(12)-C(13) | 1.388(2) |
| O(1)-C(10)      | 1.3831(18) | C(12)-C(17) | 1.390(2) |
| O(2)-C(1)       | 1.2064(19) | C(13)-C(14) | 1.395(2) |
| N(1)-N(2)       | 1.3813(18) | C(14)-C(15) | 1.387(3) |
| N(1)-C(3)       | 1.328(2)   | C(15)-C(16) | 1.388(3) |

|            |            |             |          |
|------------|------------|-------------|----------|
| N(2)-C(4)  | 1.350(2)   | C(16)-C(17) | 1.396(2) |
| N(2)-C(12) | 1.4403(19) | C(18)-C(19) | 1.392(2) |
| N(3)-C(7)  | 1.4412(19) | C(18)-C(23) | 1.400(2) |
| N(3)-C(18) | 1.423(2)   | C(19)-C(20) | 1.389(3) |
| N(3)-C(29) | 1.417(2)   | C(20)-C(21) | 1.383(3) |
| C(1)-C(2)  | 1.434(2)   | C(21)-C(22) | 1.388(3) |
| C(2)-C(3)  | 1.417(2)   | C(22)-C(23) | 1.392(3) |
| C(2)-C(4)  | 1.391(2)   | C(24)-C(25) | 1.393(3) |
| C(3)-C(11) | 1.496(2)   | C(24)-C(29) | 1.405(2) |
| C(4)-C(5)  | 1.447(2)   | C(25)-C(26) | 1.381(3) |
| C(5)-C(6)  | 1.408(2)   | C(26)-C(27) | 1.388(3) |
| C(5)-C(10) | 1.406(2)   | C(27)-C(28) | 1.395(3) |
| C(6)-C(7)  | 1.385(2)   | C(28)-C(29) | 1.394(2) |
| C(7)-C(8)  | 1.396(2)   |             |          |

| Angles (°)       |            |                   |            |
|------------------|------------|-------------------|------------|
| C(23)-S(1)-C(24) | 98.75(8)   | O(1)-C(10)-C(9)   | 115.08(13) |
| C(10)-O(1)-C(1)  | 122.99(12) | C(9)-C(10)-C(5)   | 121.47(15) |
| C(3)-N(1)-N(2)   | 105.71(13) | C(13)-C(12)-N(2)  | 119.12(15) |
| N(1)-N(2)-C(12)  | 118.74(13) | C(13)-C(12)-C(17) | 121.91(15) |
| C(4)-N(2)-N(1)   | 111.80(12) | C(17)-C(12)-N(2)  | 118.97(15) |
| C(4)-N(2)-C(12)  | 129.46(13) | C(12)-C(13)-C(14) | 118.73(16) |
| C(18)-N(3)-C(7)  | 116.97(14) | C(15)-C(14)-C(13) | 120.05(16) |
| C(29)-N(3)-C(7)  | 119.25(14) | C(14)-C(15)-C(16) | 120.64(15) |
| C(29)-N(3)-C(18) | 119.25(13) | C(15)-C(16)-C(17) | 120.05(16) |
| O(1)-C(1)-C(2)   | 115.12(13) | C(12)-C(17)-C(16) | 118.60(16) |
| O(2)-C(1)-O(1)   | 117.05(14) | C(19)-C(18)-N(3)  | 121.81(15) |
| O(2)-C(1)-C(2)   | 127.83(15) | C(19)-C(18)-C(23) | 118.87(16) |
| C(3)-C(2)-C(1)   | 131.25(14) | C(23)-C(18)-N(3)  | 119.32(15) |
| C(4)-C(2)-C(1)   | 122.74(14) | C(20)-C(19)-C(18) | 120.13(17) |
| C(4)-C(2)-C(3)   | 106.00(14) | C(21)-C(20)-C(19) | 121.05(17) |
| N(1)-C(3)-C(2)   | 110.24(14) | C(20)-C(21)-C(22) | 119.26(17) |
| N(1)-C(3)-C(11)  | 121.71(15) | C(21)-C(22)-C(23) | 120.23(17) |
| C(2)-C(3)-C(11)  | 128.04(15) | C(18)-C(23)-S(1)  | 119.24(14) |
| N(2)-C(4)-C(2)   | 106.25(14) | C(22)-C(23)-S(1)  | 120.29(13) |
| N(2)-C(4)-C(5)   | 132.68(14) | C(22)-C(23)-C(18) | 120.45(17) |
| C(2)-C(4)-C(5)   | 121.05(14) | C(25)-C(24)-S(1)  | 119.50(14) |
| C(6)-C(5)-C(4)   | 127.46(14) | C(25)-C(24)-C(29) | 120.79(17) |
| C(10)-C(5)-C(4)  | 114.65(14) | C(29)-C(24)-S(1)  | 119.37(13) |
| C(10)-C(5)-C(6)  | 117.89(14) | C(26)-C(25)-C(24) | 120.38(17) |
| C(7)-C(6)-C(5)   | 120.56(14) | C(25)-C(26)-C(27) | 119.27(17) |

|                 |            |                   |            |
|-----------------|------------|-------------------|------------|
| C(6)-C(7)-N(3)  | 117.68(14) | C(26)-C(27)-C(28) | 120.83(18) |
| C(6)-C(7)-C(8)  | 120.46(14) | C(29)-C(28)-C(27) | 120.34(17) |
| C(8)-C(7)-N(3)  | 121.85(15) | C(24)-C(29)-N(3)  | 118.80(15) |
| C(9)-C(8)-C(7)  | 120.02(15) | C(28)-C(29)-N(3)  | 122.91(15) |
| C(8)-C(9)-C(10) | 119.57(15) | C(28)-C(29)-C(24) | 118.26(16) |
| O(1)-C(10)-C(5) | 123.44(14) |                   |            |

### Crystal structure of PSeZCP

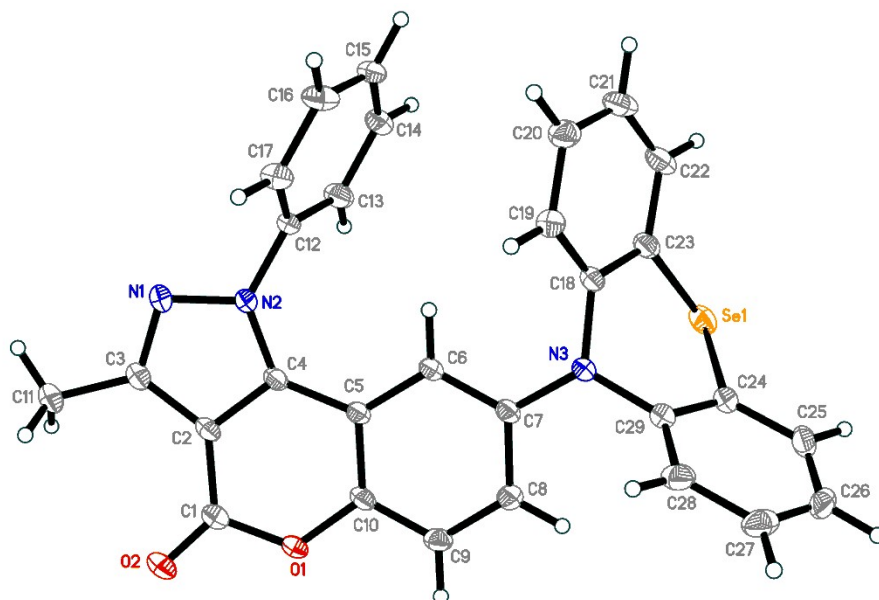

**Figure SI3.** The structure of **PSeZCP** with numeration of the non-hydrogen atoms. Thermal ellipsoids are set to the 50% probability level.

**Table SI4.** Selected bond length (Å) and angle (°) in the crystals for compound **PSeZCP**.

| Bond length (Å) |            |             |          |
|-----------------|------------|-------------|----------|
| Se(1)-C(23)     | 1.9123(18) | C(8)-C(9)   | 1.382(2) |
| Se(1)-C(24)     | 1.9127(19) | C(9)-C(10)  | 1.385(2) |
| O(1)-C(1)       | 1.386(2)   | C(12)-C(13) | 1.388(2) |
| O(1)-C(10)      | 1.3889(19) | C(12)-C(17) | 1.385(2) |
| O(2)-C(1)       | 1.206(2)   | C(13)-C(14) | 1.392(2) |
| N(1)-N(2)       | 1.3847(19) | C(14)-C(15) | 1.382(3) |
| N(1)-C(3)       | 1.325(2)   | C(15)-C(16) | 1.389(3) |
| N(2)-C(4)       | 1.348(2)   | C(16)-C(17) | 1.390(2) |
| N(2)-C(12)      | 1.432(2)   | C(18)-C(19) | 1.394(3) |
| N(3)-C(7)       | 1.406(2)   | C(18)-C(23) | 1.393(2) |
| N(3)-C(18)      | 1.427(2)   | C(19)-C(20) | 1.390(3) |
| N(3)-C(29)      | 1.428(2)   | C(20)-C(21) | 1.387(3) |
| C(1)-C(2)       | 1.439(2)   | C(21)-C(22) | 1.386(3) |
| C(2)-C(3)       | 1.416(2)   | C(22)-C(23) | 1.395(2) |

|            |          |             |          |
|------------|----------|-------------|----------|
| C(2)-C(4)  | 1.392(2) | C(24)-C(25) | 1.391(2) |
| C(3)-C(11) | 1.490(2) | C(24)-C(29) | 1.392(3) |
| C(4)-C(5)  | 1.448(2) | C(25)-C(26) | 1.369(3) |
| C(5)-C(6)  | 1.407(2) | C(26)-C(27) | 1.402(3) |
| C(5)-C(10) | 1.402(2) | C(27)-C(28) | 1.393(3) |
| C(6)-C(7)  | 1.393(2) | C(28)-C(29) | 1.400(3) |
| C(7)-C(8)  | 1.410(2) |             |          |

| Angles (°)        |            |                   |            |
|-------------------|------------|-------------------|------------|
| C(23)-Se(1)-C(24) | 93.34(8)   | O(1)-C(10)-C(5)   | 123.53(15) |
| C(1)-O(1)-C(10)   | 123.33(13) | C(9)-C(10)-O(1)   | 115.85(14) |
| C(3)-N(1)-N(2)    | 105.56(14) | C(9)-C(10)-C(5)   | 120.61(15) |
| N(1)-N(2)-C(12)   | 118.11(13) | C(13)-C(12)-N(2)  | 119.90(15) |
| C(4)-N(2)-N(1)    | 111.84(13) | C(17)-C(12)-N(2)  | 118.56(15) |
| C(4)-N(2)-C(12)   | 130.05(14) | C(17)-C(12)-C(13) | 121.54(16) |
| C(7)-N(3)-C(18)   | 123.24(14) | C(12)-C(13)-C(14) | 118.85(16) |
| C(7)-N(3)-C(29)   | 120.93(14) | C(15)-C(14)-C(13) | 120.18(17) |
| C(18)-N(3)-C(29)  | 115.20(14) | C(14)-C(15)-C(16) | 120.39(16) |
| O(1)-C(1)-C(2)    | 114.63(14) | C(15)-C(16)-C(17) | 120.07(17) |
| O(2)-C(1)-O(1)    | 116.96(16) | C(12)-C(17)-C(16) | 118.96(17) |
| O(2)-C(1)-C(2)    | 128.42(17) | C(19)-C(18)-N(3)  | 121.41(16) |
| C(3)-C(2)-C(1)    | 131.52(16) | C(23)-C(18)-N(3)  | 119.21(16) |
| C(4)-C(2)-C(1)    | 122.54(16) | C(23)-C(18)-C(19) | 119.14(16) |
| C(4)-C(2)-C(3)    | 105.93(14) | C(20)-C(19)-C(18) | 120.21(17) |
| N(1)-C(3)-C(2)    | 110.45(15) | C(21)-C(20)-C(19) | 120.16(18) |
| N(1)-C(3)-C(11)   | 121.05(16) | C(22)-C(21)-C(20) | 120.27(17) |
| C(2)-C(3)-C(11)   | 128.50(16) | C(21)-C(22)-C(23) | 119.48(18) |
| N(2)-C(4)-C(2)    | 106.22(14) | C(18)-C(23)-Se(1) | 117.61(13) |
| N(2)-C(4)-C(5)    | 132.11(15) | C(18)-C(23)-C(22) | 120.70(17) |
| C(2)-C(4)-C(5)    | 121.61(15) | C(22)-C(23)-Se(1) | 121.55(14) |
| C(6)-C(5)-C(4)    | 126.62(15) | C(25)-C(24)-Se(1) | 121.60(15) |
| C(10)-C(5)-C(4)   | 114.16(15) | C(25)-C(24)-C(29) | 120.56(18) |
| C(10)-C(5)-C(6)   | 119.15(15) | C(29)-C(24)-Se(1) | 117.79(13) |
| C(7)-C(6)-C(5)    | 120.56(15) | C(26)-C(25)-C(24) | 119.70(19) |
| N(3)-C(7)-C(8)    | 119.48(15) | C(25)-C(26)-C(27) | 120.62(17) |
| C(6)-C(7)-N(3)    | 121.93(15) | C(28)-C(27)-C(26) | 120.02(19) |
| C(6)-C(7)-C(8)    | 118.58(15) | C(27)-C(28)-C(29) | 119.14(19) |
| C(9)-C(8)-C(7)    | 121.20(16) | C(24)-C(29)-N(3)  | 119.03(16) |
| C(8)-C(9)-C(10)   | 119.69(15) | C(24)-C(29)-C(28) | 119.88(17) |

## Crystal structure of POZPhCP

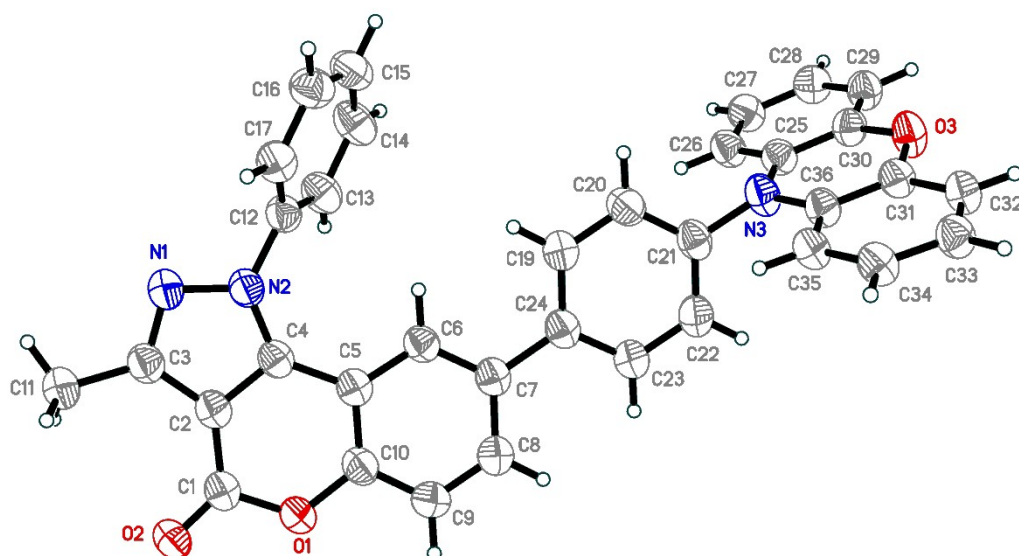

**Figure SI4.** The structure of **POZPhCP** with numeration of the non-hydrogen atoms. Thermal ellipsoids are set to the 50% probability level. The disorder is omitted.

**Table SI5.** Selected bond length (Å) and angle (°) in the crystals for compound **POZPhCP**.

| Bond length (Å) |          |             |          |
|-----------------|----------|-------------|----------|
| O(1)-C(1)       | 1.386(3) | C(12)-C(13) | 1.369(3) |
| O(1)-C(10)      | 1.385(2) | C(12)-C(17) | 1.386(3) |
| O(2)-C(1)       | 1.206(2) | C(13)-C(14) | 1.387(3) |
| O(3)-C(30)      | 1.391(2) | C(14)-C(15) | 1.372(4) |
| O(3)-C(31)      | 1.384(2) | C(15)-C(16) | 1.386(4) |
| N(1)-N(2)       | 1.378(2) | C(16)-C(17) | 1.387(3) |
| N(1)-C(3)       | 1.320(3) | C(19)-C(20) | 1.388(3) |
| N(2)-C(4)       | 1.345(3) | C(19)-C(24) | 1.392(3) |
| N(2)-C(12)      | 1.437(3) | C(20)-C(21) | 1.381(3) |
| N(3)-C(21)      | 1.440(3) | C(21)-C(22) | 1.379(3) |
| N(3)-C(25)      | 1.397(3) | C(22)-C(23) | 1.387(3) |
| N(3)-C(36)      | 1.409(3) | C(23)-C(24) | 1.393(3) |
| C(1)-C(2)       | 1.435(3) | C(25)-C(26) | 1.395(3) |
| C(2)-C(3)       | 1.411(3) | C(25)-C(30) | 1.396(3) |
| C(2)-C(4)       | 1.388(3) | C(26)-C(27) | 1.385(3) |
| C(3)-C(11)      | 1.494(3) | C(27)-C(28) | 1.378(3) |
| C(4)-C(5)       | 1.456(3) | C(28)-C(29) | 1.392(3) |
| C(5)-C(6)       | 1.399(3) | C(29)-C(30) | 1.372(3) |
| C(5)-C(10)      | 1.392(3) | C(31)-C(32) | 1.383(3) |
| C(6)-C(7)       | 1.390(3) | C(31)-C(36) | 1.398(3) |
| C(7)-C(8)       | 1.400(3) | C(32)-C(33) | 1.386(3) |
| C(7)-C(24)      | 1.493(3) | C(33)-C(34) | 1.382(3) |

|            |          |             |          |
|------------|----------|-------------|----------|
| C(8)-C(9)  | 1.379(3) | C(34)-C(35) | 1.393(3) |
| C(9)-C(10) | 1.383(3) | C(35)-C(36) | 1.389(3) |

| Angles (°)        |            |                   |            |
|-------------------|------------|-------------------|------------|
| C(10)-O(1)-C(1)   | 122.99(16) | C(17)-C(12)-N(2)  | 119.03(19) |
| C(31)-O(3)-C(30)  | 117.48(16) | C(12)-C(13)-C(14) | 119.3(2)   |
| C(3)-N(1)-N(2)    | 105.80(17) | C(15)-C(14)-C(13) | 120.7(2)   |
| N(1)-N(2)-C(12)   | 117.64(17) | C(14)-C(15)-C(16) | 119.7(2)   |
| C(4)-N(2)-N(1)    | 111.69(16) | C(15)-C(16)-C(17) | 120.2(2)   |
| C(4)-N(2)-C(12)   | 130.44(17) | C(12)-C(17)-C(16) | 119.1(2)   |
| C(25)-N(3)-C(21)  | 120.53(17) | C(20)-C(19)-C(24) | 121.5(2)   |
| C(25)-N(3)-C(36)  | 118.89(17) | C(21)-C(20)-C(19) | 120.2(2)   |
| C(36)-N(3)-C(21)  | 118.34(17) | C(20)-C(21)-N(3)  | 120.0(2)   |
| O(1)-C(1)-C(2)    | 115.20(17) | C(22)-C(21)-N(3)  | 120.7(2)   |
| O(2)-C(1)-O(1)    | 117.04(19) | C(22)-C(21)-C(20) | 119.29(19) |
| O(2)-C(1)-C(2)    | 127.8(2)   | C(21)-C(22)-C(23) | 120.3(2)   |
| C(3)-C(2)-C(1)    | 131.46(19) | C(22)-C(23)-C(24) | 121.4(2)   |
| C(4)-C(2)-C(1)    | 122.59(19) | C(19)-C(24)-C(7)  | 121.38(19) |
| C(4)-C(2)-C(3)    | 105.95(18) | C(19)-C(24)-C(23) | 117.18(19) |
| N(1)-C(3)-C(2)    | 110.33(18) | C(23)-C(24)-C(7)  | 121.44(19) |
| N(1)-C(3)-C(11)   | 121.1(2)   | C(26)-C(25)-N(3)  | 122.66(19) |
| C(2)-C(3)-C(11)   | 128.5(2)   | C(26)-C(25)-C(30) | 117.51(19) |
| N(2)-C(4)-C(2)    | 106.23(17) | C(30)-C(25)-N(3)  | 119.83(18) |
| N(2)-C(4)-C(5)    | 132.83(18) | C(27)-C(26)-C(25) | 121.0(2)   |
| C(2)-C(4)-C(5)    | 120.86(19) | C(28)-C(27)-C(26) | 120.6(2)   |
| C(6)-C(5)-C(4)    | 126.73(19) | C(27)-C(28)-C(29) | 118.9(2)   |
| C(10)-C(5)-C(4)   | 114.83(18) | C(30)-C(29)-C(28) | 120.4(2)   |
| C(10)-C(5)-C(6)   | 118.42(19) | O(3)-C(30)-C(25)  | 121.91(19) |
| C(7)-C(6)-C(5)    | 122.15(19) | C(29)-C(30)-O(3)  | 116.62(18) |
| C(6)-C(7)-C(8)    | 117.32(19) | C(29)-C(30)-C(25) | 121.46(19) |
| C(6)-C(7)-C(24)   | 120.69(19) | O(3)-C(31)-C(36)  | 122.19(18) |
| C(8)-C(7)-C(24)   | 121.99(19) | C(32)-C(31)-O(3)  | 116.78(18) |
| C(9)-C(8)-C(7)    | 121.6(2)   | C(32)-C(31)-C(36) | 121.02(19) |
| C(8)-C(9)-C(10)   | 119.9(2)   | C(31)-C(32)-C(33) | 119.93(19) |
| O(1)-C(10)-C(5)   | 123.51(19) | C(34)-C(33)-C(32) | 119.74(19) |
| C(9)-C(10)-O(1)   | 115.90(19) | C(33)-C(34)-C(35) | 120.3(2)   |
| C(9)-C(10)-C(5)   | 120.6(2)   | C(36)-C(35)-C(34) | 120.50(19) |
| C(13)-C(12)-N(2)  | 119.9(2)   | C(31)-C(36)-N(3)  | 119.30(18) |
| C(13)-C(12)-C(17) | 121.1(2)   | C(35)-C(36)-N(3)  | 122.30(18) |
|                   |            | C(35)-C(36)-C(31) | 118.39(18) |

## Structural features

In **POZCP**, the chromenopyrazole core generally deviates from the plane within 2.5 degrees°. A significant deviation is observed for the C10-C5-C6-C7 fragment with the torsion angle of 5.17(17)° and the C2-C4-C5-C10 fragment with the torsion angle of 4.64(16)°. The methyl and carbonyl groups deviate from the chromenopyrazole plane by -0.7(2)° and -2.2(2)°, respectively.

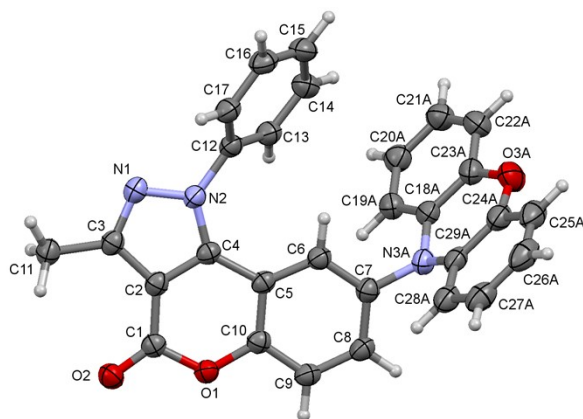

**Figure SI5.** X-ray structure of **POZCP**. Herein and thereafter, anisotropic displacement parameters are set to a 50% probability level.

The phenyl ring plane forms an angle of 52.37° with the chromenopyrazole core plane. The phenoxazine core is not planar: its side phenyl rings lie at an angle of 10.33° to each other, and the axis of bending of this fragment is the NC<sub>4</sub>O ring. For that fragment, the maximum deviation from the plane reaches -13.8(2)° for the C24A-O3A-C23A-C18A angle, and the minimum is 12.54(17)° for the C29A-N3A-C18A-C23A angle.

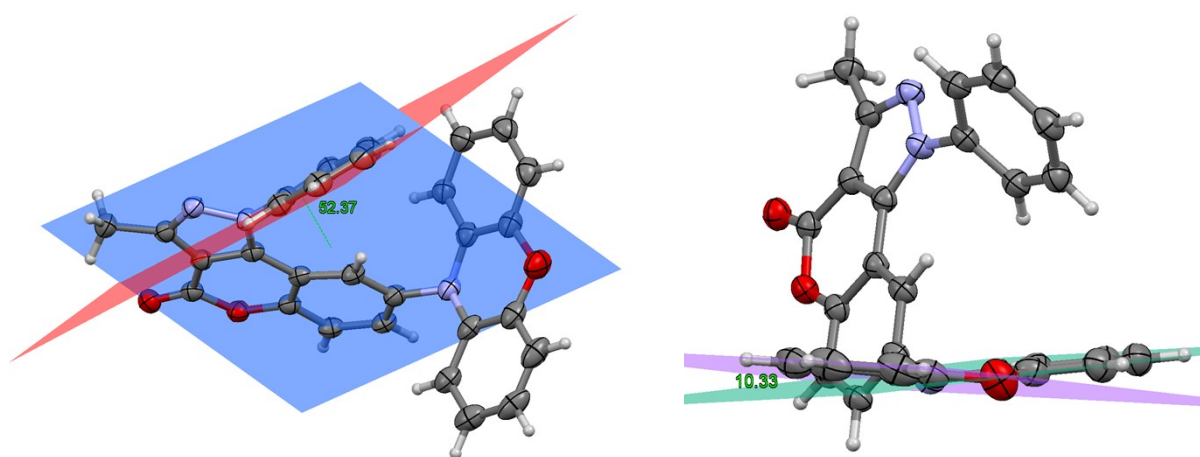

**Figure SI6.** The angle between the phenyl ring plane and the chromenopyrazole core plane (left) and the angle between the phenyl rings planes of the phenoxazine core (right) in **POZCP**.

In **PSZCP**, the deviation of the chromenopyrazole core is significantly smaller than in the **POZCP** structure. The maximum deviation is observed for the torsion angle C4-C5-C10-O1 which is  $1.5(2)^\circ$ , and the minimum is for the torsion angle N1-N2-C4-C2 which is  $-0.05(19)^\circ$ . Nevertheless, the methyl group is more deviated: the torsion angle C1-C2-C3-C11 reaches a value of  $-1.8(3)^\circ$  (when the similar angle in **POZCP** is  $-0.7(2)^\circ$ ).

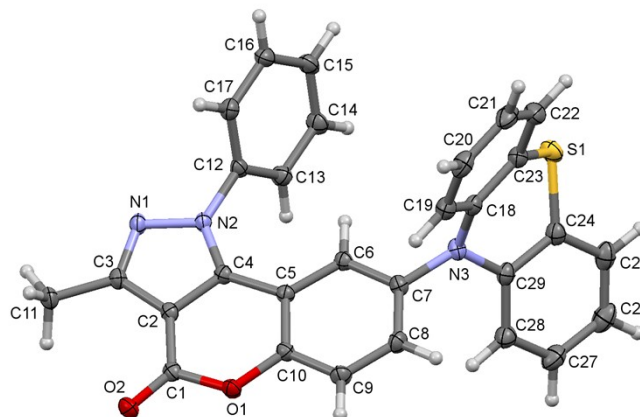

**Figure SI7.** X-ray structure of **PSZCP**.

The phenyl ring plane forms an angle of  $69.46^\circ$  with the chromenopyrazole core plane – which is greater than the observed in **POZCP**. The phenothiazine core is bent in the opposite direction compared to the **POZCP** structure. The side phenyl rings planes lie at an angle of  $36.23^\circ$  to each other. The bending of the  $\text{NC}_4\text{S}$  ring of the phenothiazine core is also greater, than the bending of the  $\text{NC}_4\text{O}$  ring: the maximum deviation from the plane reaches  $-35.76(15)^\circ$  for the C24-S1-C23-C18 angle, and the minimum is  $-7.3(2)^\circ$  for the S1-C24-C29-N3 angle. Such an increase in the ratio of bending for **PSZCP** compared to the **POZCP** is associated with an increase in the degree of freedom of the fragment due to long C-S bonds (the length of S1-C23 is  $1.7611(19) \text{ \AA}$ , the length of S1-C24 is  $1.7624(19) \text{ \AA}$ , while in **POZCP** the length of O3A-C23A is  $1.3855(17) \text{ \AA}$ , and the length of O3A-C24A is  $1.3844(19) \text{ \AA}$ ).

It is noteworthy that in the **PSZCP** the geometry of the nitrogen atom N3 is flattened: the distance from the C7-C18-C29 plane to N3 is  $0.177 \text{ \AA}$ , whereas in the **POZCP** structure the analogous distance is  $0.258 \text{ \AA}$ , and the geometry of the nitrogen atom N3A is pyramidal.

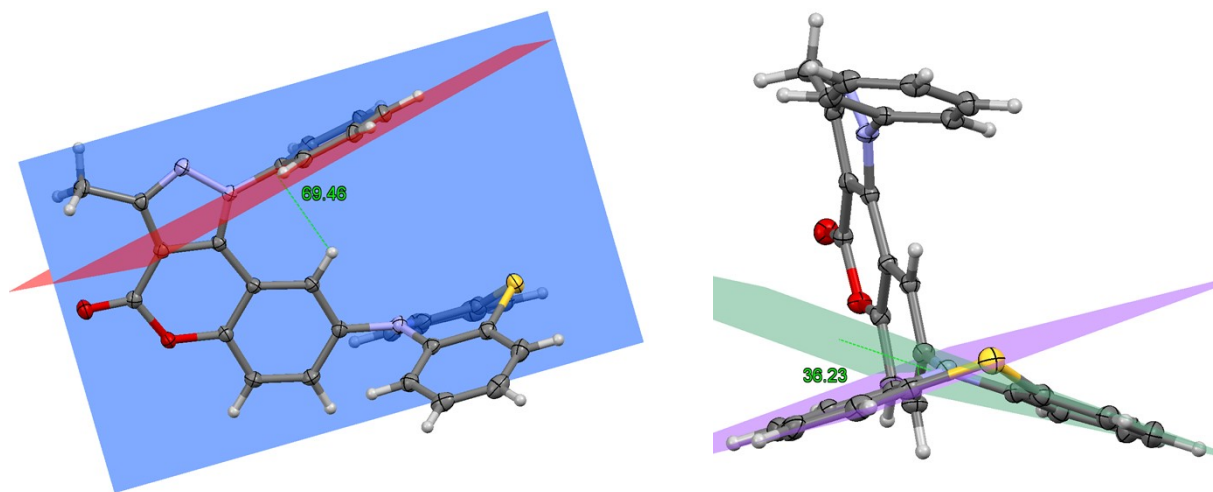

**Figure SI8.** The angle between the phenyl ring plane and the chromenopyrazole core plane (left) and the angle between the phenyl rings planes of the phenothiazine core (right) in **PSZCP**.

In **PSeZCP**, the deviation of the chromenopyrazole core is greater than in the **PSZCP**, but less than in the **POZCP**. The maximum deviation is observed for the torsion angle C10-O1-C1-C2 equal to  $4.2(2)^\circ$ , and the minimum is for the torsion angle C10-C5-C6-C7 equal to  $0.0(2)^\circ$ . The donor tricycle rotation relative to the chromenopyrazole core increases to  $0.0(2)^\circ$ . In this case, the deviation of the methyl and carbonyl groups tends to zero.

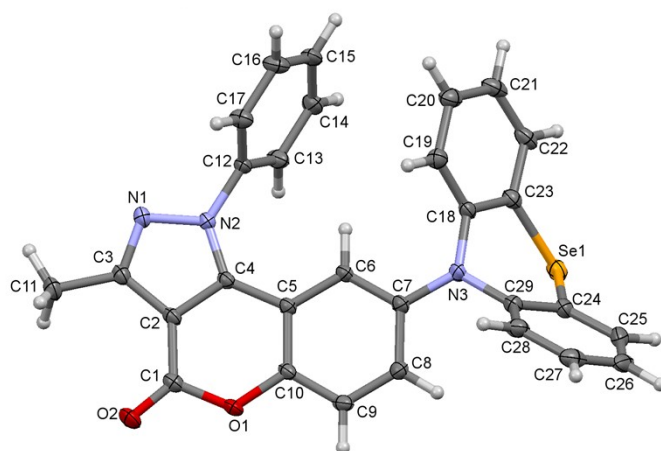

**Figure SI9.** X-ray structure of **PSeZCP**.

The rotation of phenyl ring is close to that in the **PSZCP** and reaches  $72.85^\circ$ . The phenoselenazine core is also bent similarly to the phenothiazine core in the **PSZCP**. The side phenyl rings lie at an angle of  $57.04^\circ$  to each other. It is noteworthy that the  $\text{NC}_4\text{Se}$  fragment exhibits symmetry in the ratio of bending. The torsion angles of Se1 reach close values of  $0.5(2)^\circ$  and  $0.6(2)^\circ$ , and the torsion angles of N3 are  $-54.0(2)^\circ$  and  $53.4(2)^\circ$ . The tendency of increasing the degree of fragment bending in the O-S-Se series, which was observed for the **POZCP** and **PSZCP** structures, is preserved. When the heteroatom is changed to Se, the degree of freedom of the fragment increases again due to the long C-Se bonds equal to  $1.9123(18) \text{ \AA}$  and  $1.9127(19) \text{ \AA}$  (in **PSZCP**, the S1-C23 length is  $1.7611(19) \text{ \AA}$ , the

S1-C24 length is 1.7624(19) Å, in **POZCP**, the O3A-C23A length is 1.3855(17) Å, the O3A-C24A length is 1.3844(19) Å).

The geometry of N3 in the **PSeZCP** becomes distinctly planar: the distance from the C7-C18-C29 plane to N3 reaches 0.066 Å, and this value is significantly smaller than in the **PSZCP** and **POZCP**.

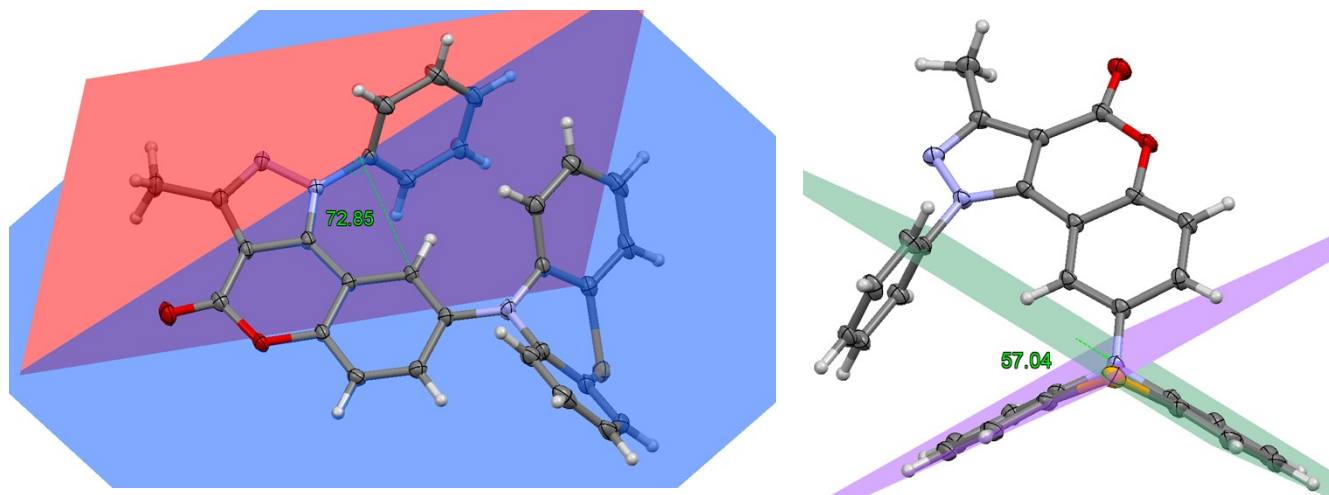

**Figure SI10.** The angle between the phenyl ring plane and the chromenopyrazole core plane (left) and the angle between the phenyl rings planes of the phoselenazine core (right) in **PSeZCP**.

The **POZPhCP** differs from the **POZCP** by the presence of a phenyl ring as a linker between the chromenopyrazole and phenoxazine cores. It is noteworthy that, despite the similarity of the compound to **POZCP**, in the **POZPhCP** the deviation of the chromenopyrazole core is significantly smaller than in the **POZCP**. The maximum deviation is observed for the C1-C2-C4-C5 torsion angle equal to  $-1.8(3)^\circ$ , and the minimum is for the N1-N2-C4-C2 torsion angle equal to  $-0.1(2)^\circ$ . The deviation of the chromenopyrazole core increases in the series of structures **PSZCP-POZPhCP-PSeZCP-POZCP**. The deviation of the methyl and carbonyl groups is close to those in the **PSZCP** structure: the torsion angle C1-C2-C3-C11 reaches a value of  $-1.6(4)^\circ$ , and the torsion angle O2-C1-C2-C3 is  $2.3(4)^\circ$ .

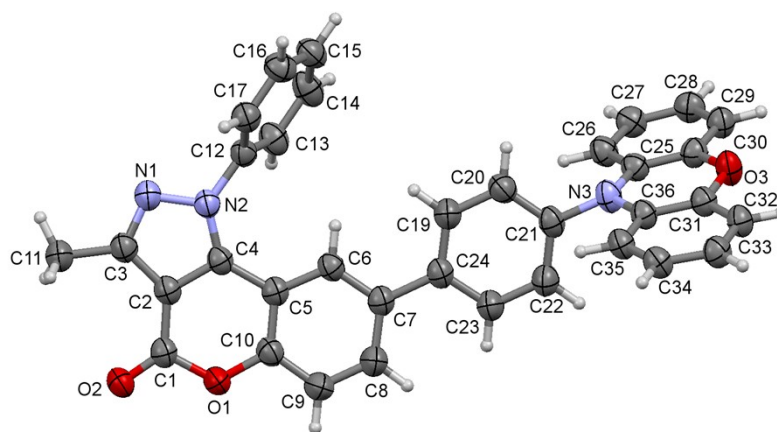

**Figure SI11.** X-ray structure of **POZPhCP**.

The phenyl ring plane forms an angle of  $64.31^\circ$  with the chromenopyrazole core plane, hence the degree of rotation of this fragment increases in the series of structures **POZCP-POZPhCP-PSZCP-PSeZCP**. The phenoxazine core demonstrates an approach to a planar conformation, the angle between the planes of its side phenyl rings reaches only  $6.26^\circ$ . The rotation of the phenoxazine core relative to the linker is equal to  $75.90^\circ$ . The linker itself also tends to a planar conformation relative to the chromenopyrazole core, forming a torsion angle C8-C7-C24-C23 equal to  $7.4(3)^\circ$ . The linker reduces the influence of the chromenopyrazole core on the phenoxazine core. The geometry of N3 in the **POZPhCP** is close to the geometry of N3 in **PSZCP**: the distance from the C21-C25-C36 plane to N3 reaches  $0.123 \text{ \AA}$ , hence the transition of N3 geometry from pyramidal to planar occurs in the series of structures **POZCP-PSZCP-POZPhCP-PSeZCP** with a pronounced change between the **POZCP** and **PSZCP** structures.

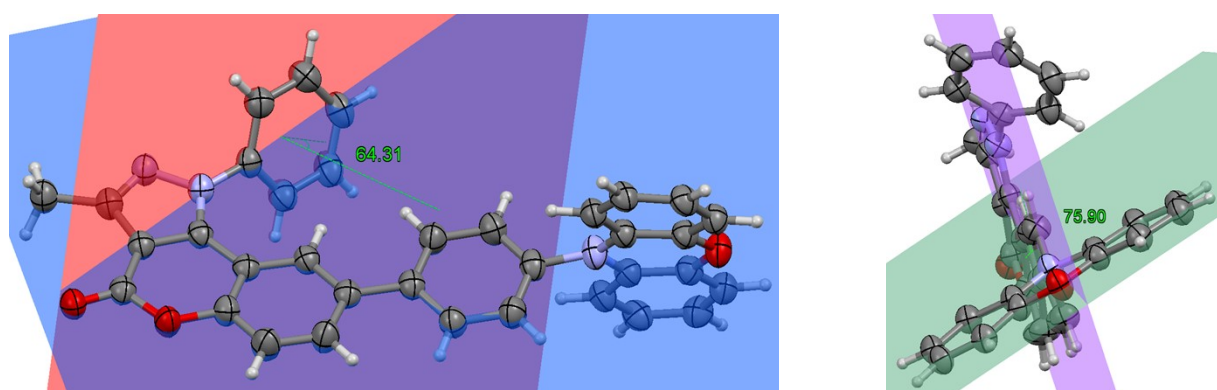

**Figure SI12.** The angle between the phenyl ring plane and the chromenopyrazole core plane (left) and the angle between the linker plane and the phenoxazine core plane (right) in **POZPhCP**.

### SI-3 CV measurements

Cyclic voltammograms of the new chromophores **POZCP**, **PSZCP**, **PSeZCP** and **POZPhCP** were obtained on a glassy carbon electrode in a DMF solution containing tetrabutylammonium tetrafluoroborate as a supporting electrolyte. The electroreduction (ER) peaks of both compounds are quasi-reversible at a potential superposition rate of 0.1 Vs<sup>-1</sup>, while the electro-oxidation (EO) peaks are irreversible up to a sweep rate of 5 Vs<sup>-1</sup>.

In order to estimate the values of the frontier orbitals, the potentials of the onset of the ER ( $E^{red}_{onset}$ ) and EO ( $E^{ox}_{onset}$ ) peaks were determined from the obtained curves relative to the potential of the reversible oxidation of ferrocene Fc/Fc<sup>+</sup>, used as an internal standard. Taking into account that the value of the absolute oxidation potential of ferrocene is -5.1 V [1, 2], the energies of the lowest free ( $E_{LUMO}$ ) and highest occupied orbitals ( $E_{HOMO}$ ) were calculated using the equations:

$$E_{HOMO} \text{ (eV)} = -|e|(E^{ox}_{onset, Fc/Fc^+} + 5.1) \quad (1)$$

$$E_{LUMO} \text{ (eV)} = -|e|(E^{red}_{onset, Fc/Fc^+} + 5.1) \quad (2)$$

The results are presented in the **Table SI6**.

**Table SI6.** Electrochemical properties of the chromophores **POZCP**, **PSZCP**, **PSeZCP** and **POZPhCP**, **PSZPhCP**, **PSeZPhCP** in DMF solution

| Compound       | $E^{red}_{onset}$ (vs Fc/Fc <sup>+</sup> ) <sup>a</sup> , V | $E_{LUMO}$ <sup>b</sup> , eV | $E^{ox}_{onset}$ (vs Fc/Fc <sup>+</sup> ) <sup>a</sup> , V | $E_{HOMO}$ <sup>b</sup> , eV | $E_g$ <sup>c</sup> , eV |
|----------------|-------------------------------------------------------------|------------------------------|------------------------------------------------------------|------------------------------|-------------------------|
| <b>POZCP</b>   | -2.19                                                       | -2.91                        | 0.24                                                       | -5.34                        | 2.43                    |
| <b>PSZCP</b>   | -2,21                                                       | -2,89                        | 0.26                                                       | -5.36                        | 2.47                    |
| <b>PSeZCP</b>  | -2.25                                                       | -2.85                        | 0.26                                                       | -5.36                        | 2.51                    |
| <b>POZPhCP</b> | -2.31                                                       | -2.79                        | 0.24                                                       | -5.34                        | 2.55                    |

<sup>a</sup> Here  $E^{ox}_{onset}$  and  $E^{red}_{onset}$  are oxidation and reduction peak potential relative to Fc/Fc<sup>+</sup> respectively.

<sup>b</sup> Energies of frontier orbitals were calculated by equations (1) and (2) and by quantum chemistry with the use of B3LYP functional

<sup>c</sup>  $E_g = E_{LUMO} - E_{HOMO}$

We estimated  $E_g$  of **POZCP**, **PSZCP**, **PSeZCP** and **POZPhCP** compounds as 2.43, 2.47, 2.51 and 2.55 eV, respectively.

### SI-4 Photophysical parameters

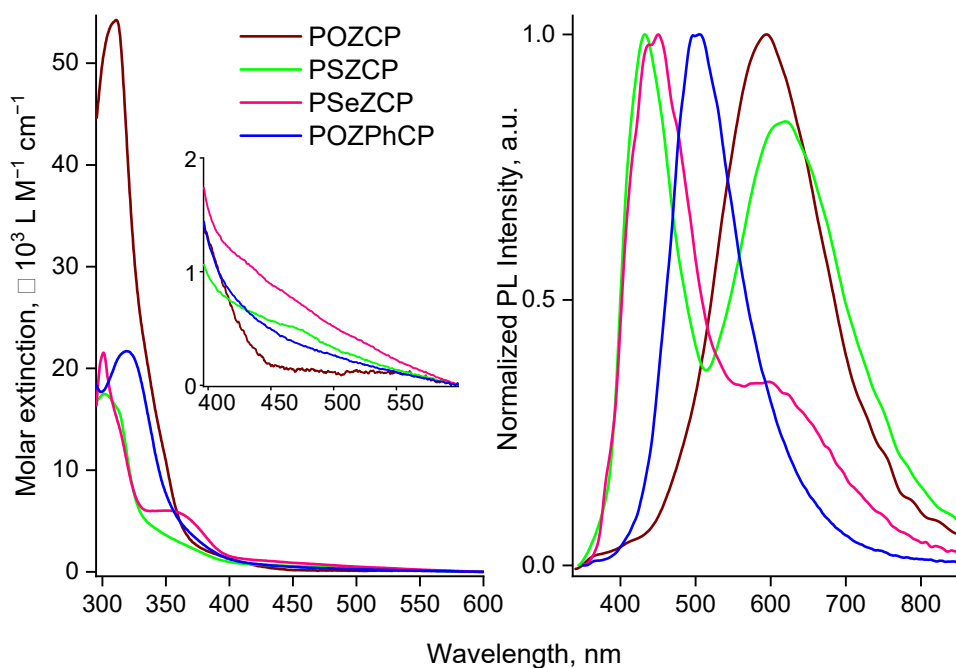

**Figure SI13.** Absorption (left) and normalized fluorescence (right) spectra of DCM dissolved **POZCP**, **PSZCP**, **PSeZCP** and **POZPhCP** dyes.

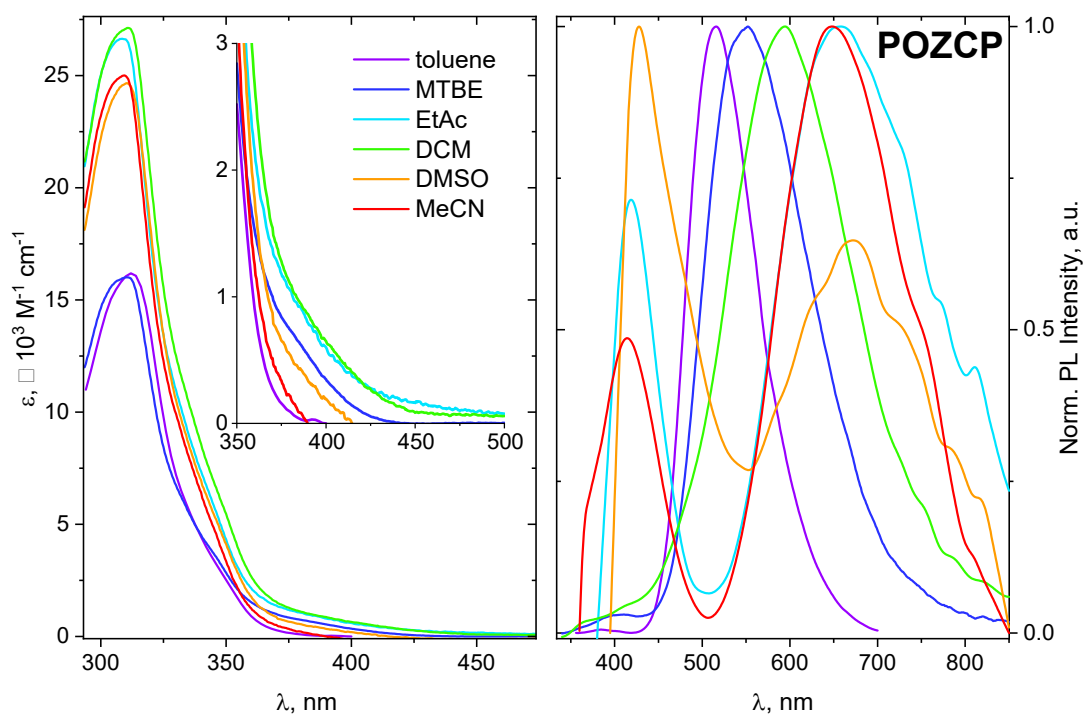

**Figure SI14 (a)** UV-vis (left) and normalized fluorescence (right) spectra of **POZCP** dyes dissolved in toluene, MTBE, EtAc, DCM, DMSO and MeCN.

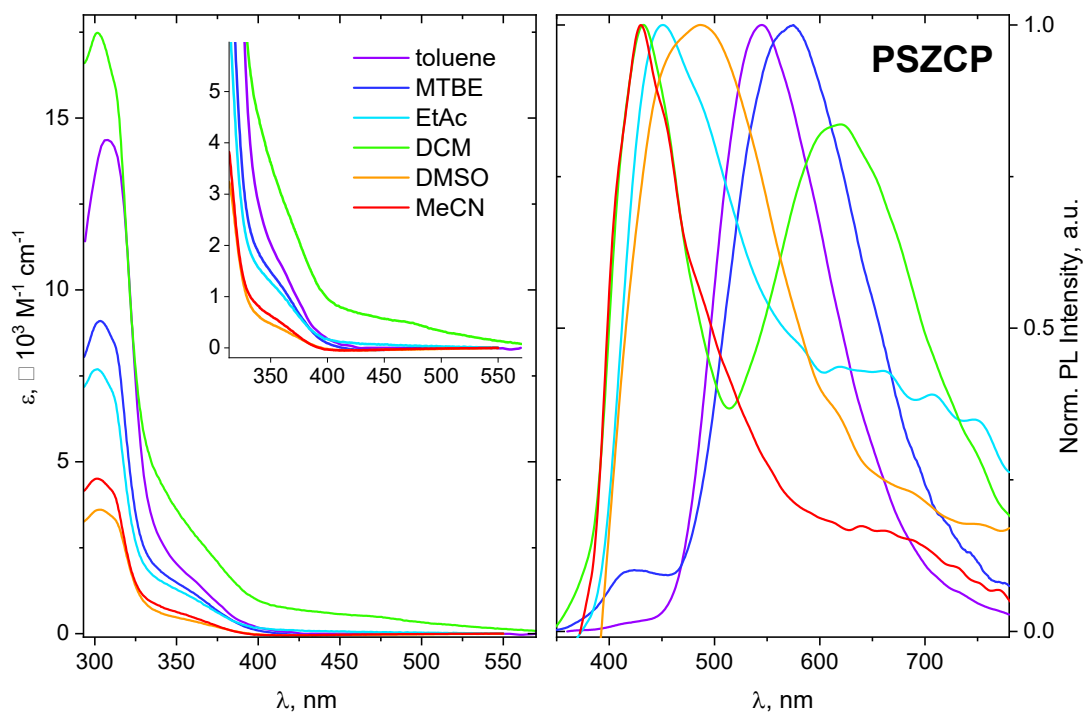

**Figure SI14 (b)** UV-vis (left) and normalized fluorescence (right) spectra of **PSZCP** dyes dissolved in toluene, MTBE, EtAc, DCM, DMSO and MeCN.

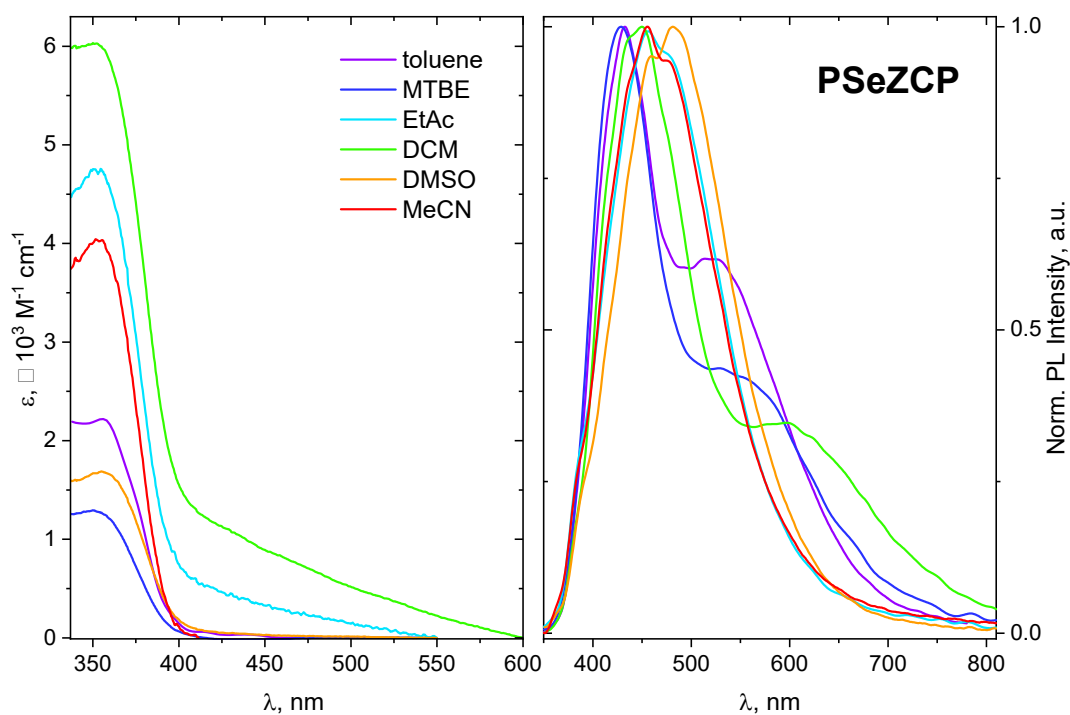

**Figure SI14 (c)** UV-vis (left) and normalized fluorescence (right) spectra of **PSeZCP** dyes dissolved in toluene, MTBE, EtAc, DCM, DMSO and MeCN.

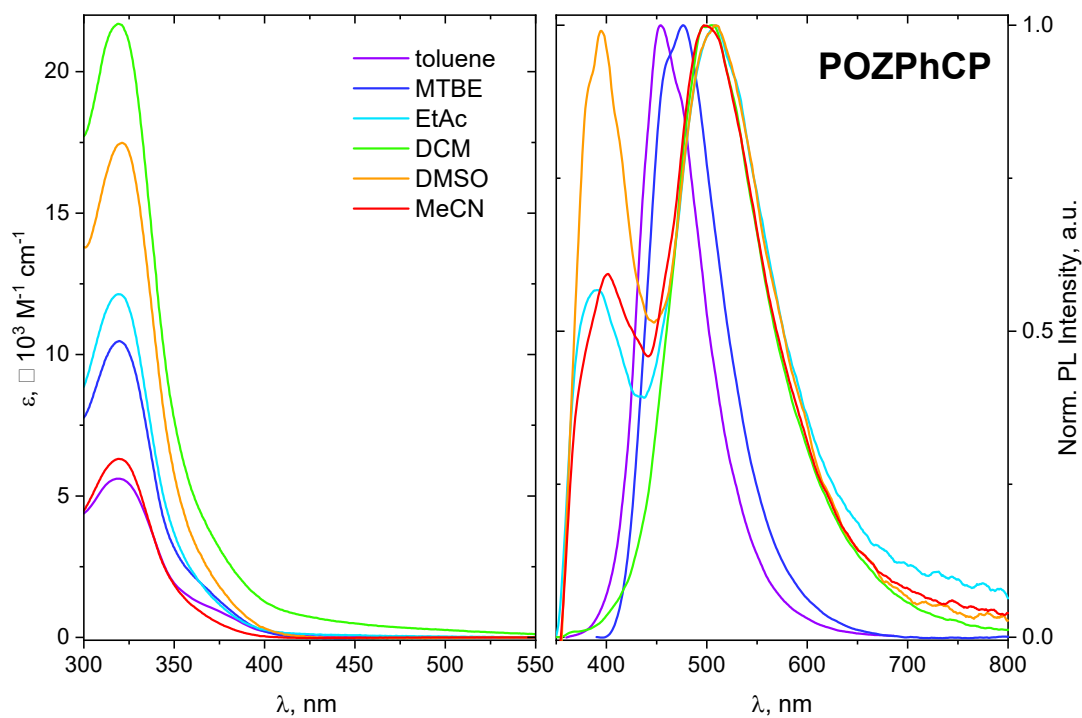

**Figure SI14 (d)** UV-vis (left) and normalized fluorescence (right) spectra of **POZPhCP** dyes dissolved in toluene, MTBE, EtAc, DCM, DMSO and MeCN.

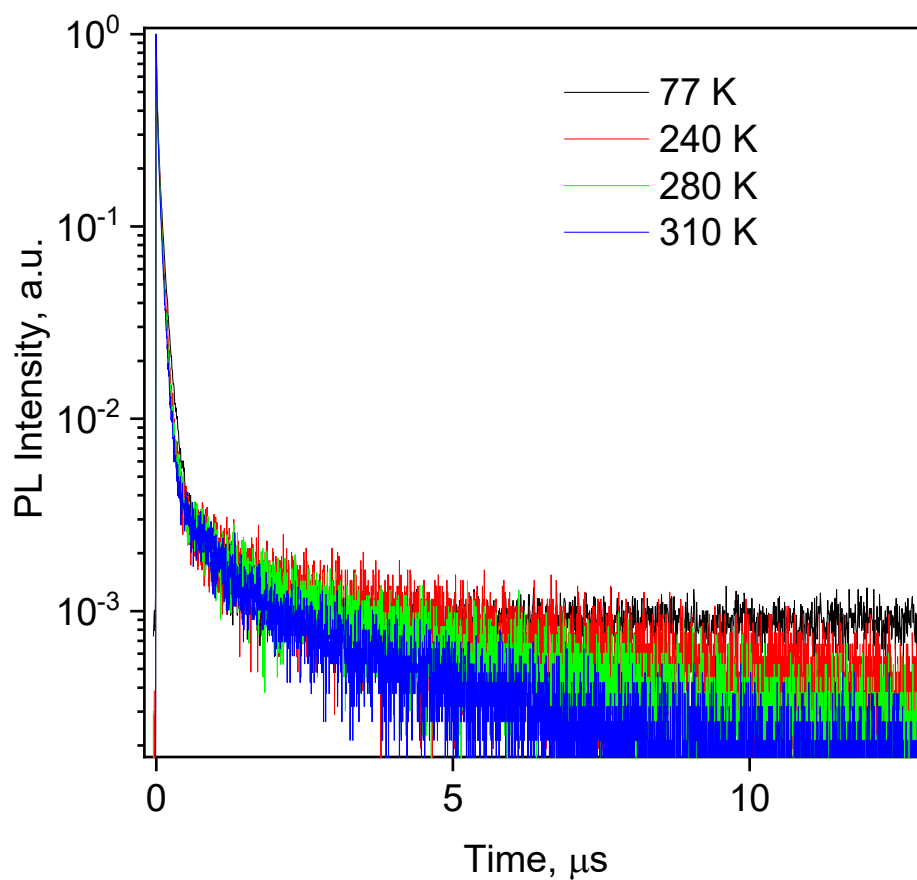

**Figure SI14 (e)** PL decay for POZCP doped into PMMA measured at 77, 240, 280 and 310 K ( $\lambda_{\text{exc}} = 376 \text{ nm}$ ,  $\lambda_{\text{reg}} = 540 \text{ nm}$ )

*Estimation of the rate constants*

Rate constants were determined from the measurements of quantum yields and lifetimes of fluorescence and TADF components according to the equations

$$k_{\text{rad}} = \Phi_p / \tau_p \quad (1)$$

$$\Phi = k_{\text{rad}} / (k_{\text{rad}} + k_{\text{nrad}}) \quad (2)$$

$$k_{\text{nrad}} = k_{\text{rad}} \cdot (1/\Phi - 1)$$

$$k_{\text{ISC}} = (1 - \Phi_p) / \tau_p \quad (3)$$

$$\Phi_{\text{nrad}} = k_{\text{nrad}} / (k_{\text{rad}} + k_{\text{nrad}} + k_{\text{ISC}}) \quad (4)$$

$$\Phi_{\text{ISC}} = 1 - \Phi_p - \Phi_{\text{nrad}} = k_{\text{ISC}} / (k_{\text{rad}} + k_{\text{nrad}} + k_{\text{ISC}}) \quad (5)$$

$$k_{\text{del}} = \Phi_{\text{del}} / (\Phi_{\text{ISC}} \cdot \tau_{\text{del}}) \quad (6)$$

$$k_{\text{RISC}} = \Phi_{\text{del}} / (k_{\text{ISC}} \cdot \tau_p \cdot \tau_{\text{del}} \cdot \Phi_p) \quad (7)$$

$\Phi_{\text{nrad}}$  – efficiency of non-radiative processes,  $\Phi_{\text{ISC}}$  – efficiency of intersystem crossing process

**Table S17 (a).** Photophysical parameters obtained for dyes dissolved in different solvents: peak of the long-wavelength gauss in absorption spectrum  $\lambda_{\text{ICT}}$ , maximum molar extinction coefficient  $\epsilon_{\text{max}}$ , emission maximum wavelength  $\lambda_{\text{FLUO}}$ , full width half-maximum FWHM for the emission bands, Stokes shift  $\Delta\nu$ , energy of the first excited singlet state  $E(S_1)$ .

| Dye           | Solvent | $\lambda_{\text{ICT}}$ , nm | $\epsilon_{\text{max}} \times 10^3$ ,<br>$M^{-1} \cdot \text{cm}^{-1}$ | $\lambda_{\text{FLUO}}$ , nm | FWHM,<br>nm | $\Delta\nu$ , $10^3$<br>$\text{cm}^{-1}$ | $E(S_1)$<br>eV |
|---------------|---------|-----------------------------|------------------------------------------------------------------------|------------------------------|-------------|------------------------------------------|----------------|
| <b>POZCP</b>  | toluene | 342                         | 16.3                                                                   | 516                          | 94          | 9.9                                      | 2.76           |
|               | MTBE    | 369                         | 16.0                                                                   | 548                          | 139         | 8.9                                      | 2.84           |
|               | EtAC    | 338                         | 26.3                                                                   | 419, 656                     | 60, 203     | 14.3                                     | 2.45           |
|               | DCM     | 380                         | 27.2                                                                   | 595                          | 164         | 9.5                                      | 2.20           |
|               | DMSO    | 358                         | 24.6                                                                   | 428, 672                     | 89, 196     | 13.1                                     | 2.38           |
|               | MeCN    | 365                         | 25.1                                                                   | 414, 648                     | 83, 171     | 12.0                                     | 2.96           |
| <b>PSZCP</b>  | toluene | 334                         | 14.3                                                                   | 545                          | 124         | 11.6                                     | 3.03           |
|               | MTBE    | 344                         | 9.1                                                                    | 420, 573                     | 65, 148     | 11.6                                     | 2.45           |
|               | EtAC    | 334                         | 7.7                                                                    | 450                          | 153         | 7.7                                      | 2.95           |
|               | DCM     | 400                         | 17.5                                                                   | 431, 616                     | 87, 152     | 8.8                                      | 2.37           |
|               | DMSO    | 338                         | 3.6                                                                    | 486                          | 165         | 9.0                                      | 2.70           |
|               | MeCN    | 336                         | 4.5                                                                    | 430*, 651                    | 98, 172     | 14.4                                     | 3.06           |
| <b>PSeZCP</b> | toluene | 375                         | 2.2                                                                    | 432, 532                     | 67, 156     | 7.9                                      | 3.28           |
|               | MTBE    | 366                         | 1.3                                                                    | 429, 557                     | 92, 195     | 9.4                                      | 3.06           |
|               | EtAC    | 365                         | 4.7                                                                    | 456                          | 133         | 5.5                                      | 2.78           |
|               | DCM     | 369                         | 6.0                                                                    | 447, 601                     | 100, 194    | 10.5                                     | 2.33           |

|                |         |     |      |          |         |      |      |
|----------------|---------|-----|------|----------|---------|------|------|
|                | DMSO    | 368 | 1.7  | 481      | 135     | 6.4  | 2.57 |
|                | MeCN    | 365 | 4.1  | 454      | 131     | 5.4  | 3.10 |
| <b>POZPhCP</b> | toluene | 392 | 5.7  | 454      | 74      | 5.0  | 2.79 |
|                | MTBE    | 354 | 10.5 | 476      | 83      | 8.7  | 3.00 |
|                | EtAC    | 326 | 12.1 | 390, 510 | 61, 122 | 12.0 | 3.11 |
|                | DCM     | 352 | 21.7 | 509      | 109     | 9.7  | 2.65 |
|                | DMSO    | 349 | 17.5 | 394, 508 | 80, 126 | 9.3  | 2.62 |
|                | MeCN    | 347 | 6.4  | 401, 499 | 79, 118 | 8.3  | 3.15 |

**Table SI7 (b).** Efficiency of prompt fluorescence ( $\Phi_p$ ), delayed fluorescence ( $\Phi_{del}$ ), intersystem crossing process ( $\Phi_{ISC}$ ) and non-radiative relaxation process ( $\Phi_{nrad}$ ) obtained for dyes for the dyes doped in PMMA of 10wt%.

| Dye            | $\Phi_p$<br>% | $\Phi_{del}$<br>% | $\Phi_{ISC}$<br>% | $\Phi_{nrad}$<br>% |
|----------------|---------------|-------------------|-------------------|--------------------|
| <b>POZCP</b>   | 6.3           | 4.2               | 61.0              | 34.9               |
| <b>PSeZCP</b>  | 2.9           | 2.6               | 65.1              | 33.0               |
| <b>POZPhCP</b> | 9.1           | 4.9               | 58.4              | 35.8               |

**Table SI7 (c).** Lifetimes for **POZCP** doped into PMMA measured in degassed atmosphere upon 360 nm at temperature region of 77-310 K

| Temperature, K | $\tau_p$ , ns | $\tau_{del}$ , ns |
|----------------|---------------|-------------------|
| 78             | 69            | 246               |
| 100            | 73            | 346               |
| 140            | 82            | 645               |
| 160            | 81            | 736               |
| 180            | 93            | 1697              |
| 200            | 74            | 2543              |
| 220            | 101           | 2631              |
| 240            | 76            | 2719              |
| 250            | 78            | 2643              |
| 260            | 74            | 2292              |
| 280            | 74            | 2062              |
| 290            | 71            | 1818              |
| 300            | 73            | 1787              |
| 310            | 67            | 1522              |

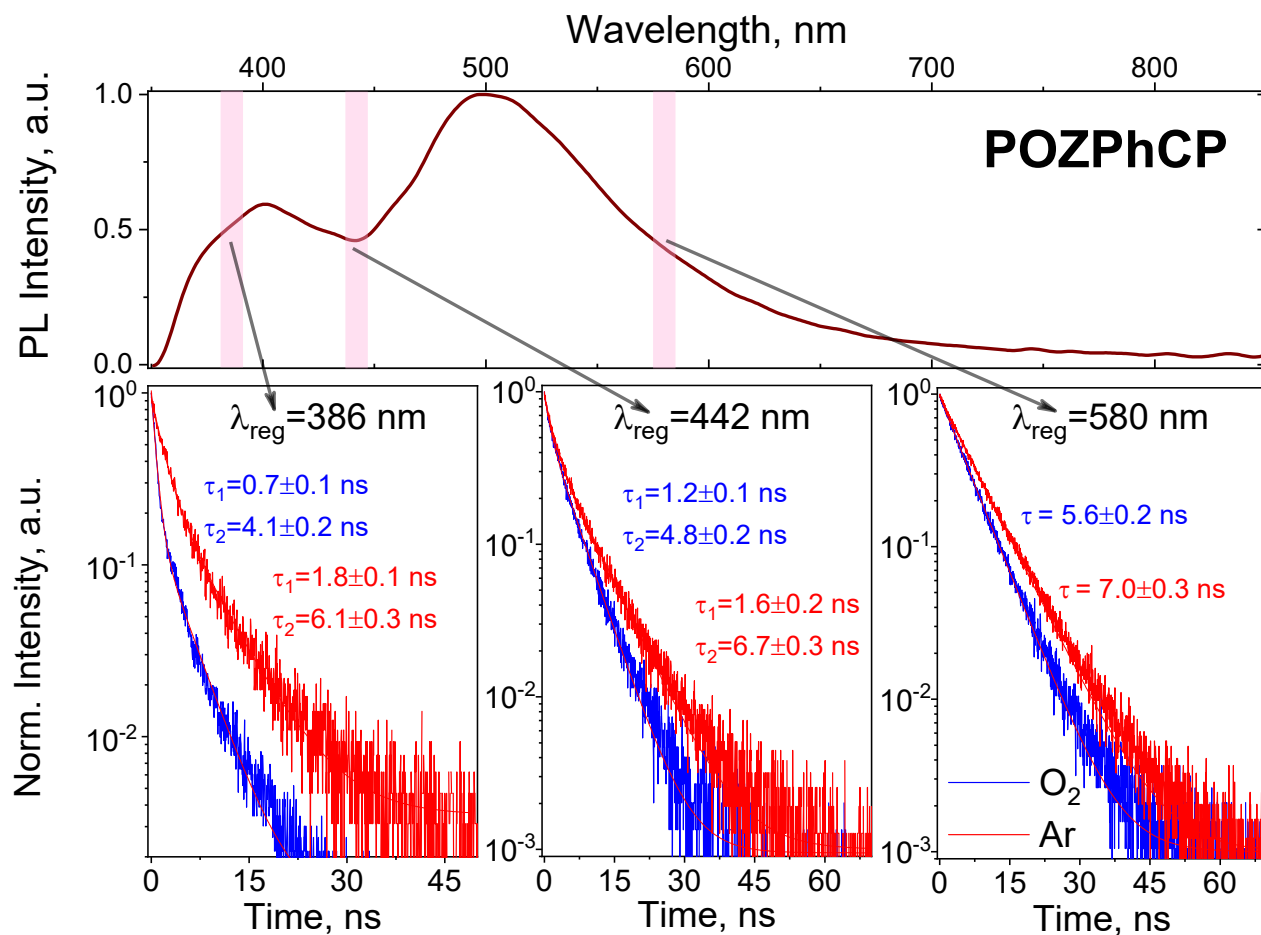

**Figure SI15.** top: Normalized PL spectrum of MeCN dissolved **POZPhCP** dye; bottom: PL decays recorded for aerated (blue curve) and degassed (red curve) solution upon excitation at 376 nm registered at 386 nm, 442 nm and 580 nm at 300 K.

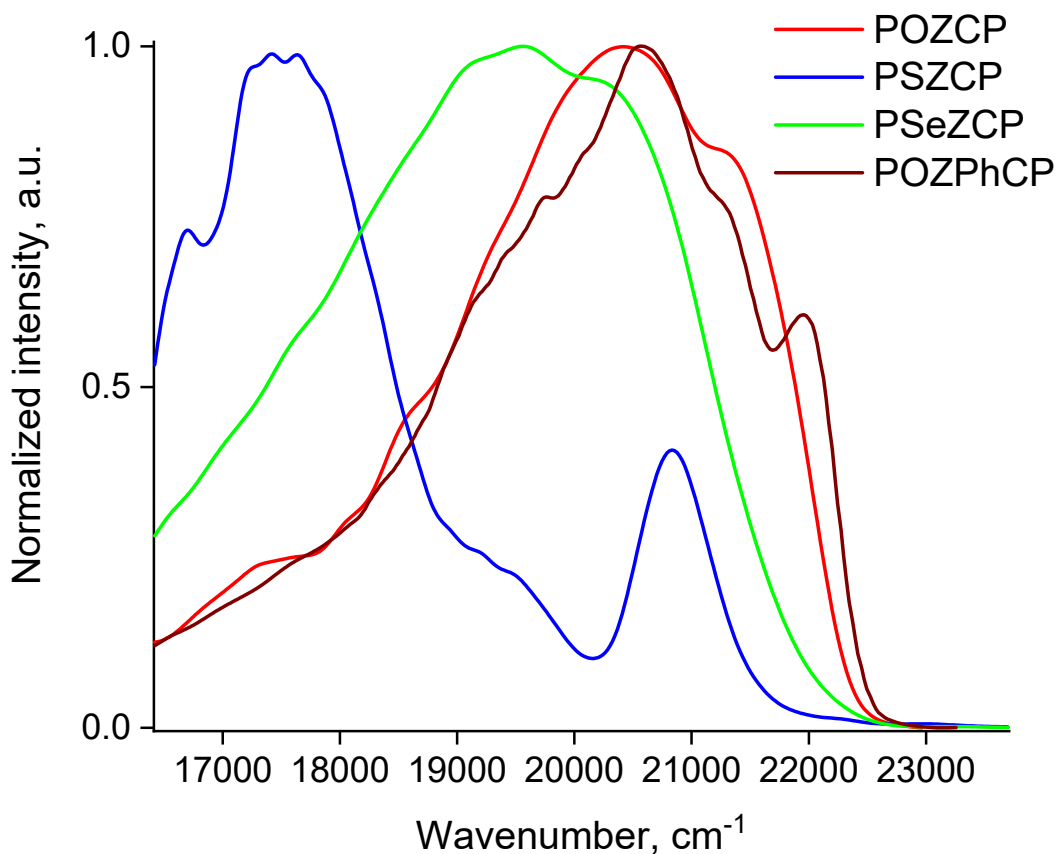

**Figure SI16.** Normalized phosphorescence spectra of tolune dissolved **POZCP**, **PSZCP**, **PSeZCP** and **POZPhCP** dyes recorded upon excitation at 340 nm with time delay 100  $\mu$ s at 77 K.

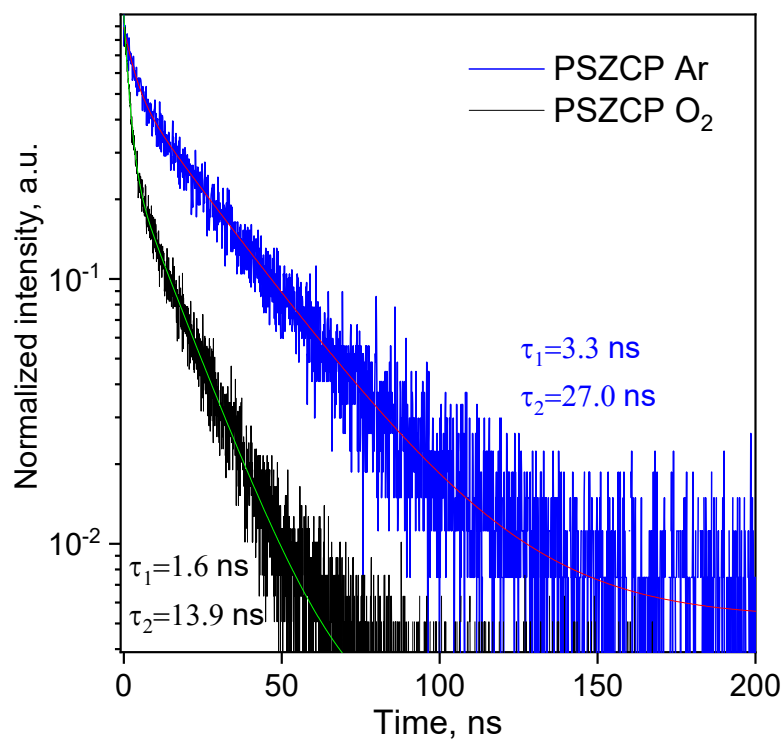

**Figure SI17.** PL decay for tolune dissolved **PSZCP** dye in aerated (black curve) and degassed (blue curve) atmosphere upon excitation at 376 nm recorded at 540 nm at 300 K.

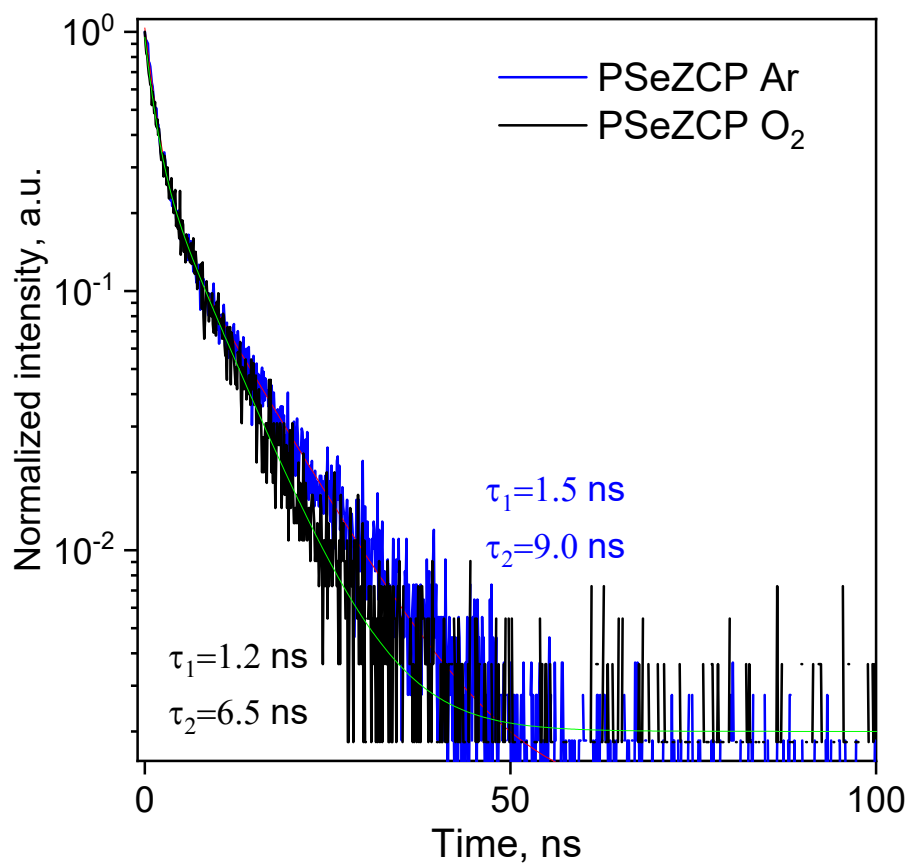

**Figure SI18.** PL decay for toluene dissolved **PSeZCP** dye in aerated (black curve) and degassed (blue curve) atmosphere upon excitation at 376 nm recorded at 540 nm at 300 K.

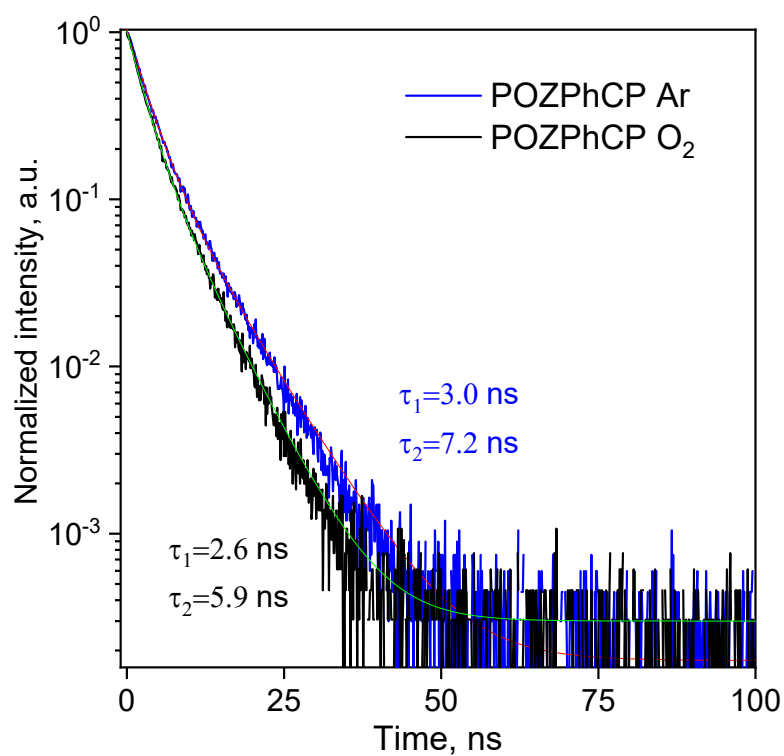

**Figure SI19.** PL decay for toluene dissolved **POZPhCP** dye in aerated (black curve) and degassed (blue curve) atmosphere upon excitation at 376 nm recorded at 540 nm at 300 K.

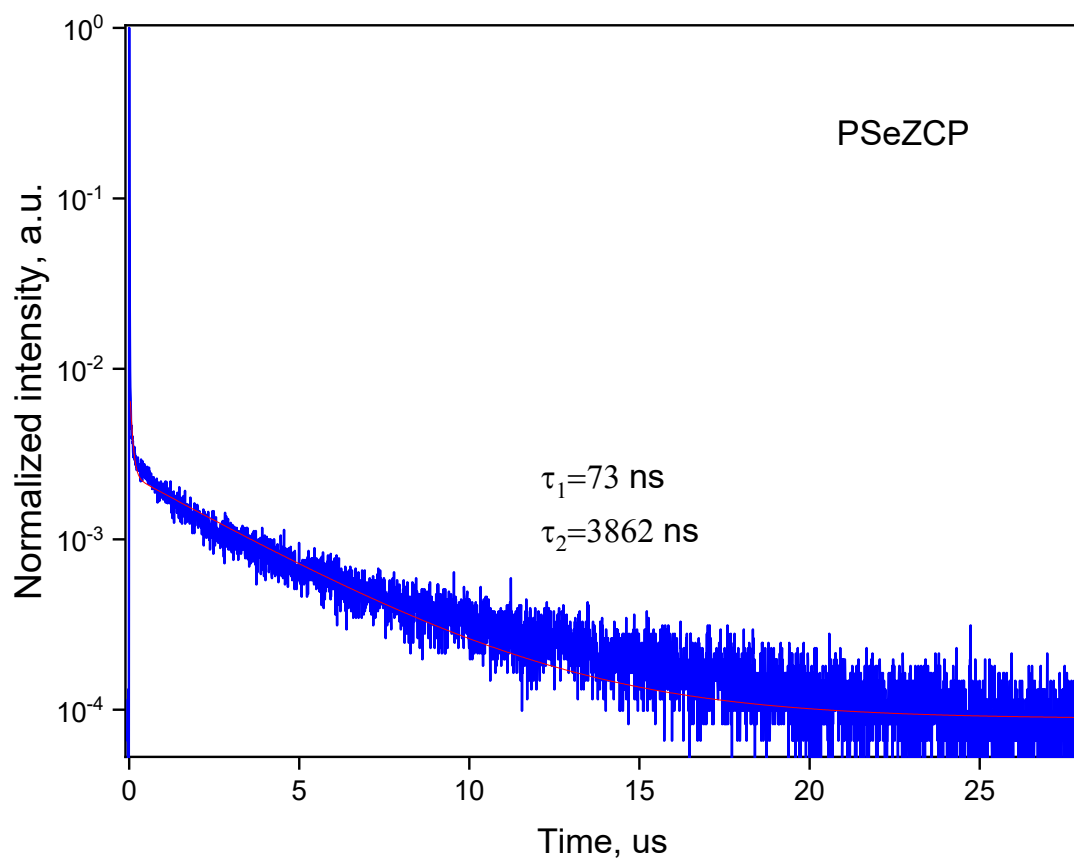

**Figure SI20.** PL decay for **PSeZCP** dye in thin film upon excitation at 376 nm recorded at 540 nm at 300 K.

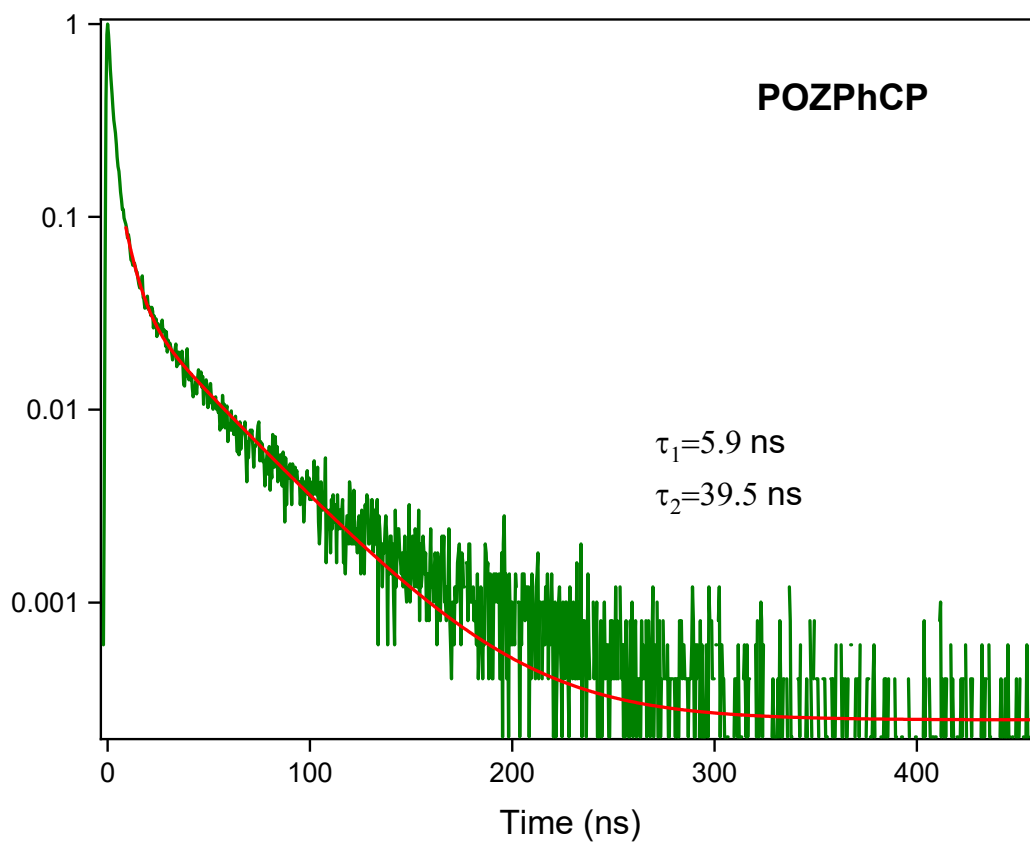

**Figure SI21.** PL decay for **POZPhCP** dye in thin film upon excitation at 376 nm recorded at 540 nm at 300 K.

## SI-5 Quantum-chemical calculations

**Table SI8.** Quantum-chemical calculations results.

| $\mu(S_0)$ , Debye. | $\mu(S_1)$ relax, D. | $\Delta\mu(S_{1\text{ relax}}-S_0)$ , D. | ${}^R D_{CT}$ , Ang. | $q_{CT}$ (transferred charge) A.u. |
|---------------------|----------------------|------------------------------------------|----------------------|------------------------------------|
| 4.04                | 21.64                | 17.6                                     | 3.156                | 1.216                              |

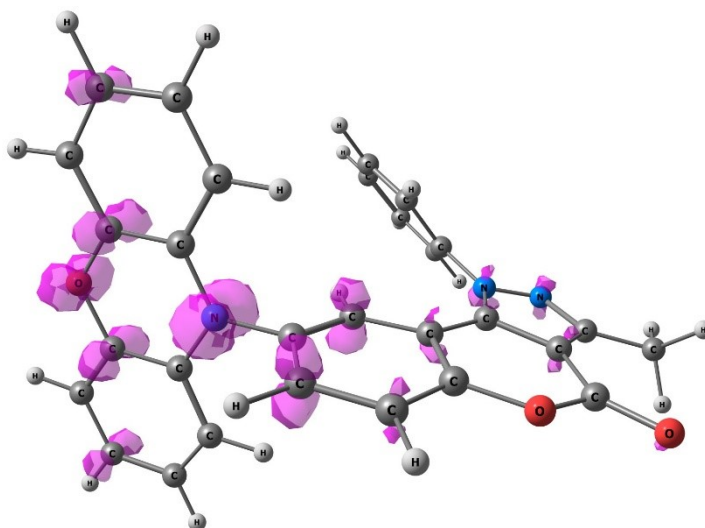

**Figure SI22.** Spin density plot (at  $T_1$  geometry).

## SI-6. Comparison of data reported for several representative sky-blue TADF emitters

**Table SI9.** OLED performances of reported sky-blue TADF emitters

| Name            | Structure | PL-QYs, % | E <sub>gap</sub> , eV | EQE, % | $\lambda_{\text{max}} \text{EL}$ , nm | Reference          |
|-----------------|-----------|-----------|-----------------------|--------|---------------------------------------|--------------------|
| <b>DMAC-TRZ</b> |           | 83        | 3                     | 26.5   | 495                                   | 10.1039/C5CC05022G |
| <b>HCB-3</b>    |           | 92        | 3.35                  | 24.1   | 492                                   | 10.1039/D4TC05347H |

|                |                                                                                                                              |    |      |      |     |                                |
|----------------|------------------------------------------------------------------------------------------------------------------------------|----|------|------|-----|--------------------------------|
| <b>ACRSA</b>   | 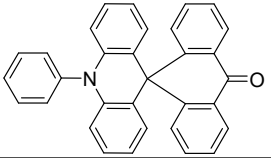                                            | 45 | -    | 16.4 | 486 | 10.1039/C3CC<br>44179B.        |
| <b>1MPA</b>    |                                             | 70 | 3.55 | 13.6 | 491 | 10.1039/D1TC<br>03598C         |
| <b>DtBuCzB</b> |                                             | 91 | 2.55 | 21.6 | 488 | 10.1002/adom.<br>201902142     |
| <b>AcCBz</b>   |                                             | 60 | 2.93 | -    | 465 | 10.1021/acs.jpcc<br>c.8b08357  |
| <b>PerTz1</b>  | <br>R = COOC <sub>10</sub> H <sub>21</sub> | -  | 2.34 | 1.8  | 535 | 10.1002/ejoc.2<br>01800161     |
| <b>TDBA-Ac</b> |                                           | 93 | 3    | 21.5 | 465 | 10.1038/s4156<br>6-019-0415-5. |
| <b>TZ</b>      |                                           | 32 | 2.89 | 1.1  | 520 | 10.1039/c6tc03<br>063g         |

|                 |                                                                                   |    |   |      |     |                    |
|-----------------|-----------------------------------------------------------------------------------|----|---|------|-----|--------------------|
| <b>DMAC-DPS</b> | 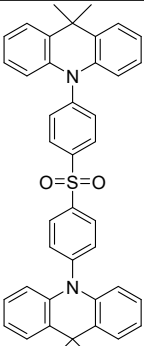 | 68 | 3 | 12.2 | 505 | 10.1039/C6TC00418K |
|-----------------|-----------------------------------------------------------------------------------|----|---|------|-----|--------------------|

### SI-7. EQE of devices with TADF emitters

At lower dye contents, a short-wavelength band belonging to the host appeared in the EL spectra, and with its increase, concentration quenching was present. In both cases, a decrease in the maximum current (CE), luminous efficiency (PE), external quantum efficiency (EQE) and brightness was observed.

The TAZ molecule contains a triazole moiety, which provides high electron mobility of  $10^{-4} \text{ cm}^2\text{V}^{-1}\text{s}^{-1}$ ,<sup>38</sup> in addition, the position of its LUMO energy level ( $-2.7 \text{ eV}$ ) coincides with the corresponding level of TmPyPb (Figure 9, a), which ensures barrier-free transition of electrons to the EML and movement towards the EML/HTL boundary, where recombination with holes occurs.

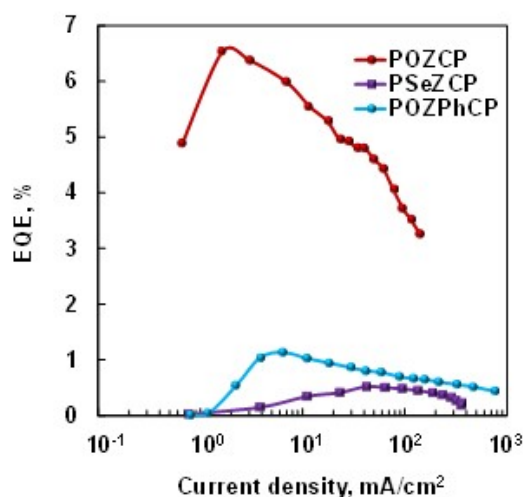

**Figure SI23.** Dependence of EQE on the current density of OLEDs with emissive layers containing dyes in a CBP host possessing TADF. The dye content in all EMLs was 17 wt%.

The OLED based on a blue TADF emitter, 10,10' (sulfonylbis(4,1-phenylene))bis(9,9-dimethyl-9,10-dihydroacridine) (DMAC-DPS, achieved a maximum EQE as high as 19.5% but the T50 (time to 50% of initial luminance) was only 1 h at an initial luminescence of  $500 \text{ cd m}^{-2}$  [3].

The luminance of OLEDs based on 2,6-bis(3,6-diphenyl-9H-carbazol-9-yl)-9H-xanthen-9-one

(23PCX), and 3,6-bis(3,6-diphenyl-9H-carbazol-9-yl)-9H-xanthen-9-one (33PCX) as a function of operational time under constant current density at an initial luminance ( $L_0$ ) of  $1000 \text{ cd m}^{-2}$   $LT_{95} \approx 13$  and  $\approx 15$  h. The  $LT_{95}$  of those devices at an initial luminance of  $100 \text{ cd m}^{-2}$  can be extrapolate in  $\approx 650$  h for 33PCX and  $\approx 750$  h for 23 PCX-based devices.[4]

Recently, substantial efforts have been devoted on improving the operation lifetimes of devices based on v-DABNA as emitter by developing stable TADF sensitizers. And the  $LT_{95}$ s of  $\approx 18$  h and  $< 10$  h at initial luminance of  $1000 \text{ cd m}^{-2}$  have been obtained by Adachi's group and Lee's group, respectively.

## References

1. Cardona, C.M.; Li, W.; Kaifer, A.E.; Stockdale, D.; Bazan, G.C. Electrochemical Considerations for Determining Absolute Frontier Orbital Energy Levels of Conjugated Polymers for Solar Cell Applications. *Adv. Mater.* 2011, 23, 2367–2371, doi:10.1002/adma.201004554.
2. Bujak, P.; Kulszewicz-Bajer, I.; Zagorska, M.; Maurel, V.; Wielgus, I.; Pron, A. Polymers for electronics and spintronics. *Chem. Soc. Rev.* 2013, 42, 8895, doi:10.1039/c3cs60257e
3. D. Zhang, M. Cai, Y. Zhang, D. Zhang and L. Duan, *Mater. Horiz.*, 2016, 3, 145–151.
4. Zhang, D., Wada, Y., Wang, Q., Dai, H., Fan, T., Meng, G. & Kaji, H. (2022). Highly efficient and stable blue organic light-emitting diodes based on thermally activated delayed fluorophor with donor-void-acceptor motif. *Advanced Science*, 9(12), 2106018.
